# Supplementary material for: Reanalysis of and attribution to near-surface ozone concentrations in Sweden during 1990–2013
Source: Copernicus journal article supplement (doi:10.5194/acp-2017-338), 2017-06-20

# Reanalysis of and attribution to near-surface ozone concentrations in Sweden during 1990-2013

Camilla Andersson<sup>1</sup>, Heléne Alpfjörd<sup>1</sup>, Lennart Robertson<sup>1</sup>, Per Erik Karlsson<sup>2</sup> and Magnuz Engardt<sup>1</sup>

[1]{Swedish Meteorological and Hydrological Institute, SE-60176 Norrköping, Sweden}

[2]{Swedish Environmental Research Institute, P.O. Box 53021, SE-40014 Gothenburg, Sweden}

Correspondence to: C. Andersson (camilla.andersson@smhi.se)

## Abstract

We have constructed two data sets of hourly resolution reanalyzed near-surface ozone (O<sub>3</sub>) concentrations for the period 1990-2013 for Sweden. Long-term simulations from a chemistry-transport model (CTM) covering Europe were combined with hourly ozone concentration observations at Swedish and Norwegian background measurement sites using retrospective variational data analysis. The reanalysis data sets show improved performance over the original CTM when compared to independent observations.

In one of the reanalyses we included all available hourly near-surface O<sub>3</sub> observations, whilst in the other we carefully selected time-consistent observations. Based on the second reanalysis we investigated statistical aspects of the distribution of the near-surface O<sub>3</sub> concentration, focusing on the linear trend over the 24 year period. We show that high near-surface O<sub>3</sub> concentrations are decreasing and low O<sub>3</sub> concentrations are increasing, which is reflected in observed improvement of many health and vegetation indices (apart from those with a low threshold).

Using the CTM we also conducted sensitivity simulations to quantify the causes of the observed change, focusing on three factors: change in hemispheric background concentrations, meteorology and anthropogenic emissions. The rising low concentrations of near-surface O<sub>3</sub> in Sweden are caused by a combination of all three factors, whilst the

Borttaget: assimilation

Borttaget: than

Borttaget: in order to avoid introducing artificial trends

Borttaget: mirrored b

Borttaget: y

Borttaget: chemistry-transport model

Borttaget: processes

Borttaget: (Swedish and other European)

Borttaget: processes

decrease in the highest O<sub>3</sub> concentrations is caused by [European](#) O<sub>3</sub> precursor emissions reductions.

While studying the impact of anthropogenic emissions changes, we identified systematic differences in the modelled trend compared to observations that must be caused by incorrect trends in the utilised emissions inventory or by too high sensitivity of our model to emissions changes.

**Borttaget:** relative

## 1 Introduction

Elevated concentrations of near-surface ozone (O<sub>3</sub>) are a major policy concern, given their ability to damage both vegetation (e.g. Royal Society, 2008) and human health (e.g. WHO, 2006). It is also an important greenhouse gas (e.g. [Stocker et al., 2013](#)). Elevated O<sub>3</sub> concentrations are formed in the troposphere by the oxidation of volatile organic compounds (VOCs) and carbon monoxide ([CO](#)), driven by solar radiation in a polluted air mixture that includes nitrogen oxides (NO<sub>x</sub>, [sum of nitric oxide and nitrogen dioxide: NO+NO<sub>2</sub>](#)). Close to combustion sources, the background O<sub>3</sub> concentration is reduced through reactions with directly emitted [NO](#) (see for example [Finlayson-Pitts and Pitts, 2000](#)). However, further away from the source and with sufficient availability of VOCs and [under favorable weather conditions](#) these NO<sub>x</sub> emissions can lead to rises in the O<sub>3</sub> concentration. O<sub>3</sub> can be transported to regions far away from the area where it was formed and even across continents (e.g. Akimoto, 2003; Derwent et al. 2015). Oxidized nitrogen can also be transported to remote regions as reservoir species, such as peroxy-acetyl nitrates (PANs). These can be a significant source of NO<sub>x</sub> and alongside naturally emitted biogenic VOCs cause O<sub>3</sub> formation in otherwise non-polluted areas (e.g. Jacob et al., 1993; [Fiore et al., 2011](#)).

**Borttaget:** IPCC

**Formaterat:** Inte Upphöjd/ Nedsänkt

**Formaterat:** Inte Upphöjd/ Nedsänkt

**Borttaget:**

**Borttaget:** nitric oxide

**Borttaget:** NO<sub>2</sub>

**Borttaget:** the right weather conditions,

European and North American anthropogenic emissions of NO<sub>x</sub> increased over most of the 20<sup>th</sup> century, but decreased strongly since the 1980s due to emission control (e.g. Lamarque et al., 2010; Granier et al., 2011). Asian emissions have continued to rise under the same period (Ohara et al., 2007). Jonson et al. (2006) showed that the trend in O<sub>3</sub> concentration in Europe cannot be fully explained by changes in European precursor emissions. By inter-continental transport the increasing precursor emissions in Asia could contribute to increasing background levels with at least a strong impact in North America (Vestraeten et al., 2015), whilst the trend in European background O<sub>3</sub> seasonal variation could also be affected by the decreases in North American precursor emissions ([Fiore et al., 2009](#); Derwent et al., 2015).

1 Climate also changes over time, causing both changes to the O<sub>3</sub> forming potential, biogenic  
2 emissions of O<sub>3</sub> precursors and deposition processes (Andersson and Engardt, 2010).  
3 Variability in climate, such as the North Atlantic Oscillation (NAO), contributes to the  
4 variation in O<sub>3</sub> concentration in the upper troposphere through variations both in the  
5 stratospheric contribution and in the transport patterns (Gaudel et al., 2015). Although the  
6 stratospheric contribution to the O<sub>3</sub> concentration at the surface is generally small (3-5  
7 ppb(v)) in Europe (Lelieveld and Dentener, 2000), it can be a relevant contribution to near-  
8 surface O<sub>3</sub> in certain areas and time periods (Zanis et al., 2014) and could affect the observed  
9 trend in near-surface O<sub>3</sub> (e.g. Fusco and Logan, 2003). Despite the large number of studies of  
10 tropospheric O<sub>3</sub>, a number of challenges still remain, such as explaining the near-surface  
11 concentration trends (Monks et al., 2015).

12 Observations in the northern mid-latitudes, either at the surface (Oltmans et al, 2006) or from  
13 ozone-sondes and commercial aircraft (Logan et al., 2012), present the picture of increasing  
14 tropospheric O<sub>3</sub> concentrations during the second half of the 20<sup>th</sup> century (Parrish et al., 2012;  
15 Cooper et al., 2014). The strong increase in near-surface O<sub>3</sub> concentration until the late 1990s  
16 at Mace Head, has levelled out to relatively stationary annual values throughout the 2000s  
17 (Derwent et al., 2013; Cooper et al, 2014). At Pico Mountain Observatory in the Azores, a  
18 decreasing O<sub>3</sub> concentration trend was observed during 2001-2011 which was believed to be  
19 mainly caused by decreasing precursor emissions in North America (Kumar et al., 2013). Air  
20 masses with European origin observed at Mace Head show a decrease in summertime peak O<sub>3</sub>  
21 concentrations and increase in wintertime, which is believed to be connected to European  
22 NO<sub>x</sub> policy (Derwent et al., 2013). O<sub>3</sub> concentrations observed at European alpine sites and in  
23 ozone-sonde data (MOZAIC) above European cities have decreased since 1998 with the  
24 strongest decrease in summer (Logan et al., 2012).

25 Several modelling efforts have been conducted to describe the past near-surface O<sub>3</sub>  
26 concentration development (e.g. Fusco and Logan, 2003; Schultz et al., 2007; Pozolli et al.,  
27 2011, Xing et al. 2015). Parrish et al. (2014) present past trends in tropospheric O<sub>3</sub>  
28 concentrations modelled with three chemistry-climate models and conclude that while there is  
29 considerable qualitative agreement between the measurements and the models, there are also  
30 substantial and consistent quantitative disagreements. The models capture only 50 % of the  
31 change observed during the last 5-6 decades and little of the observed seasonal differences,  
32 and the rate of the trends are poorly captured. There are ways forward to improve the

**Borttaget:** three widely separated North Atlantic sites, including

**Borttaget:** seems to have peaked or

**Borttaget:** remained

**Formaterat:** Teckensnitt: Inte Fet

**Borttaget:**

**Borttaget:** (Simmonds et al 2004; Oltmans et al., 2006; Derwent et al., 2007)

**Borttaget:** these include that t

**Borttaget:** that

**Borttaget:** badly

description of the trends in models: 1) understanding the processes and improving the model description of the physics and chemistry for processes of greatest importance in these models, 2) improving the input data quality and 3) incorporating observations in the model by data fusion methods to accurately represent the past statistics in a reanalysis. The first two are important for conducting scenario calculations, whilst the last is an option for producing mappings.

If correctly conducted, data fusion will improve the modelled estimates. If temporal and spatial consistency is not considered, it may however introduce artificial trends. Artificial trends can for example arise from the introduction of new observation sites, which reduce the model bias in the area surrounding the measurement site during the time it is included but not before. Data assimilation, a subset to data fusion (Zhang et al., 2012), is the process by which observations of the real world are incorporated into the model state of a numerical model, in this case into the chemistry-transport model (CTM) (Kalnay, 2003; Denby and Spangl, 2010). Advanced data assimilation schemes like the 4 dimensional variational technique (4dvar; e.g. Courtier et al., 1994; Inness et al., 2013) utilize information provided by satellites and propagate this in space and time from a limited number to a wide range of chemical components to provide fields that are physically and chemically consistent with the observations. Inness et al. (2013) performed a reanalysis of global chemical composition, including O<sub>3</sub> concentration, for 2003-2010 using advanced data assimilation of satellite observations within the framework of the monitoring atmospheric composition and climate (MACC) project. They demonstrated improved O<sub>3</sub> and CO concentration profiles for the free troposphere, but biases remained for the lower troposphere. Another reanalysis of near-surface O<sub>3</sub> concentration in Europe, also within the MACC project, was conducted for the period 2003-2012 (Katragkou et al., 2015). In this reanalysis 4dvar data assimilation was also used to incorporate retrievals from satellites. The data assimilation reduced the bias in near-surface O<sub>3</sub> concentration in most of Europe, and it reproduced the summertime maximum in most parts of Europe, but not the early spring peak in northern Europe. A third global reanalysis using data assimilation of satellite data for 2005-2012, showed improved performance for many chemical species (Miyazaki et al., 2015) but for the O<sub>3</sub> concentration at the surface errors remain associated with low retrieval sensitivity in the lower troposphere and gaps in spatial representation between the model and observations. In order to improve surface characteristics, in situ observations of O<sub>3</sub> need to be included in the data assimilation.

**Borttaget:** correct a

**Borttaget:** while

**Borttaget:** a system

**Borttaget:**

**Borttaget:** technique

**Borttaget:** Another

**Borttaget:** Another reanalysis of near-surface O<sub>3</sub> concentration in Europe was conducted for the period 2003-2012 within the MACC project (Katragkou et al., 2015). The reanalysis was based on the MACC global model, which consists of the European Centre for Medium-Range Weather Forecasts' Integrated Forecast System (IFS) coupled to the MOZART-3 CTM. In this reanalysis 4dvar data assimilation was used to incorporate in situ measurement from the databases EMEP and Airbase. The data assimilation reduced the bias in near-surface O<sub>3</sub> concentration in most of Europe, and it reproduced the summertime maximum in most parts of Europe, but not the early spring peak in northern Europe.



1 When restricting the observations to in situ measurements in Europe, the beginning of the  
 2 time period of the reanalysis can be extended further back in time utilizing simpler variational  
 3 data analysis techniques. ~~Variational data analysis in 2 dimensions (2dvar) and the analytical~~  
 4 counterpart optimal interpolation can be used as a CPU-efficient diagnostic tools to improve  
 5 modelled near-surface O<sub>3</sub> retrospectively (e.g. Alpfjord and Andersson, 2015; Robichaud and  
 6 Ménard, 2014).

**Borttaget:** assimilation

**Borttaget:** than 4dvar

**Borttaget:** c

7 The MATCH (Multi-scale Atmospheric Transport and CHemistry) Sweden system (Alpfjord  
 8 and Andersson, 2015) includes an operational CTM and methods for variational data analysis  
 9 of atmospheric concentrations in air and precipitation. ~~In this study, the MATCH Sweden~~  
 10 system is used to conduct a reanalysis of the hourly near-surface O<sub>3</sub> concentration for Sweden  
 11 and Norway during the 24-year period 1990-2013 using 2dvar. We use time-consistent input  
 12 data to avoid the introduction of artificial trends in the results. In an attempt to understand the  
 13 trends, we perform model sensitivity analyses and apply the CTM without variational data  
 14 analysis. This approach brings new knowledge to explain the trends in O<sub>3</sub> concentrations  
 15 found in Sweden.

**Borttaget:** data assimilation

**Borttaget:** The system is used for annual assessments of the near-surface O<sub>3</sub>, SO<sub>2</sub>, NH<sub>3</sub> and NO<sub>2</sub> background concentrations and deposition of nitrogen, sulfur and base cations in Sweden. I

**Borttaget:** assimilation

16 The aims of this study are:

- 17 - To create a state-of-the art, long-term, temporally and spatially consistent, reanalysis  
 18 of hourly near-surface O<sub>3</sub> concentrations covering the geographical areas of Sweden  
 19 and Norway (see Sect. 2)
- 20 - To evaluate the performance of the O<sub>3</sub> reanalysis of the MATCH Sweden system, used  
 21 in the annual assessment of air quality in Sweden (see Sect. 3.1)
- 22 - To investigate trends and extreme values in near-surface O<sub>3</sub> in Sweden (see Sect. 3.2)  
 23 and its implications on health and vegetation (see Sect. 3.4)
- 24 - To understand the causes of the change over time, focusing on contributions of  
 25 emission change, lateral and upper boundary concentrations and meteorological  
 26 variability. (see Sect. 3.3)

27

## 28 2 Method

29 In this study we utilize variational data analysis in order to combine the best qualities of a  
 30 CTM and long-term measurements to map near-surface O<sub>3</sub> concentrations during a long

**Borttaget:** assimilation

**Borttaget:** respective

**Borttaget:** both

historical time period (1990-2013). We focus our study on Sweden, but also include Norway in the variational data analysis.

Borttaget: assimilation

For the variational data analysis we use the MATCH Sweden system, which is briefly explained in Sect. 2.1. Here variational analysis in two dimensions is applied, and further details are given in Sect. 2.4. Concentration fields provided by the CTM at each grid point are considered as the “first guess” (background field/prior information) of our “best estimate” of the state of the atmosphere before the introduction of observations (Kalnay, 2003). The method used for the production of the “first guess” is explained in Sect. 2.2. The selection of measurements that are included in the variational data analysis is important, both to avoid artificial trends in the reanalysis data and in order to select observation sites with corresponding spatial and temporal representations as in the model. We explain our method for the selection of measurements in Sect. 2.3.

Borttaget: assimilation

Borttaget: assimilation

One aim of this study is to investigate trends in near-surface O<sub>3</sub> in Sweden. To understand the long-term changes in concentration we try to quantify the causes of change, through model sensitivity analyses, and applying the MATCH model without variational data analysis. We investigate the respective contributions to the trends of change in European emissions by separating the impact on O<sub>3</sub> trends of changes in local emissions in Sweden, in hemispheric background concentrations (including changes to the top and lateral boundaries) and in meteorology (including changes to biogenic emissions, transport, O<sub>3</sub> forming capacity, O<sub>3</sub> deposition etc.). The method for this quantification is described in Sect. 2.5. The methods we use for evaluation are given in Sect. 2.6.

Borttaget: assimilation

## 2.1 The MATCH Sweden system

The MATCH Sweden system is an operational system used for annual assessments of near-surface regional background concentrations in air of O<sub>3</sub>, NO<sub>2</sub>, ammonia (NH<sub>3</sub>) and sulfur dioxide (SO<sub>2</sub>) as well as deposition of sulfur, nitrogen and base cations over Sweden (Alpfjörð and Andersson, 2015). The system includes an operational CTM (MATCH; Multi-scale Atmospheric Transport and Chemistry; Robertson et al., 1999) and methods for variational data analysis (using 2dvar) of atmospheric concentrations in air and precipitation. The yearly results from the mapping can be found at [www.smhi.se/klimatdata/miljo/atmosfarskemi](http://www.smhi.se/klimatdata/miljo/atmosfarskemi).

Borttaget: ph

Borttaget: assimilation

The flow-chart in Fig. 1 describes the parts of the MATCH Sweden system that are used in this reanalysis of near-surface O<sub>3</sub> concentrations. Explanations are provided in Sect. 2.2 to 2.4. For a description of the whole MATCH Sweden system, see e.g. Alpfjörð and Andersson (2015).

## 2.2 First guess – model assessment

The starting point (cf. Fig. 1) for the two-dimensional retrospective variational data analysis of near-surface O<sub>3</sub> is hourly fields of modelled O<sub>3</sub>, produced by MATCH. The MATCH model includes ozone- and particle-forming photo-chemistry with ~60 species (Langner et al., 1998; Andersson et al., 2007, 2015). Part of the gas-phase chemical scheme was updated based on Simpson et al. (2012), except for some reaction rates (following the recommendations by the International Union of Pure and Applied Chemistry, IUPAC), and the isoprene chemistry mechanism that was based on an adapted version of the Carter one-product mechanism (Carter, 1996; Langner et al., 1998). A selection of compounds with different ozone forming potentials is used to represent all hydrocarbons emitted into the atmosphere. The photolysis rates depend on the photolytically active radiation, which is dependent on latitude, time of day, cloud cover etc. In this study MATCH interpolates the input meteorology and emissions to a domain covering Europe and surrounding areas with 44 km grid point spacing. MATCH uses all meteorological model layers for vertical wind calculations, but restricts the calculations of chemistry and transport to the lower troposphere using the vertical levels of the meteorological model from the surface up to ca 5 km height, which is the the model's standard configuration for pan-European simulations. The selected set-up has been demonstrated (e.g. Andersson et al., 2007; Langner et al., 2012a; Markakis et al., 2016) to be adequate for describing near-surface O<sub>3</sub> across Europe although trends in stratospheric chemistry or physically driven changes in stratospheric-tropospheric exchanges will likely not be captured.

MATCH is an offline model, thus, driven by meteorological data generated externally and as such it is often a challenge to undertake long (multi-decadal) simulations due to non-homogenous input data. Dynamical meteorological models, which provide the three-dimensional meteorology for the offline CTMs, are constantly updated to higher resolutions and more advanced physical schemes. Emission inventories are typically constructed for

**Borttaget:** assimilation

**Borttaget:** -

**Formaterat:** Nedsänkt

**Formaterat:** Tyska (Tyskland)

certain target years and different methods may have been used to compile total emissions and/or the geographical distribution of the emissions. Careless combination of different emission data or meteorology from varying model configurations can introduce artificial secular trends in the modelling of atmospheric pollutants. In this study, we specifically aimed for internally coherent input data, although it led to compromises in e.g. the temporal coverage of the meteorology and the resolution of the gridded pan-European emissions. In the following sections we briefly describe the utilized input data. [Further details of MATCH in the present model version and its ability to simulate near-surface O<sub>3</sub> can be found in separate publications, for example Markakis et al. \(2016\), Lacressoniere et al. \(2016\) and Watson et al. \(2015; 2016\).](#)

**Borttaget:** Emissions of biogenic isoprene are calculated online in MATCH following the E-94 isoprene emission methodology proposed by Simpson et al. (1995). Further details of MATCH in the present model version and its ability to simulate near-surface O<sub>3</sub> can be found in separate publications, for example Markakis et al. (2016), Lacressoniere et al. (2016) and Watson et al. (2015; 2016).

## 2.2.1 Meteorology and boundary concentrations

In the present study we force MATCH with three-dimensional meteorology from the numerical weather forecast model HIRLAM. Within the EURO4M-project HIRLAM was run as forecasts from 6-hourly analyses, composed of [three-dimensional](#) variational upper air analyses and optimal interpolation surface analyses (Dahlgren et al., 2016). Lateral and lower (sea surface temperature and sea ice) boundaries were taken from ERA-Interim (Dee et al., 2011). Full three-dimensional model states needed to run MATCH are available from 1979 through February 2014. Under EURO4M, HIRLAM was running on a domain covering Europe and Northern Africa with 22 km grid point spacing and 60 vertical layers from the surface to 10 hPa.

**Borttaget:** (<http://www.euro4m.eu>)

**Borttaget:** in 3 dimensions

Although the present study focuses on Sweden it is necessary to realistically describe the fluxes of O<sub>3</sub> [and its precursors](#) from continental Europe and further afield. Hemispheric [background](#) concentrations of all species [for the modelled year 2000](#) are similar to the ones used by Andersson et al. (2007). As in Andersson et al. (2007), boundary values representative for the [average concentrations at the](#) lateral and top boundaries of relevant species are interpolated spatially with a monthly temporal resolution. Boundary concentrations of O<sub>3</sub>, oxidized nitrogen and methane are [furthermore](#) scaled to mimic observed changes in the hemispheric background during the period 1990 through 2013 [following the work of Engardt et al. \(2017\)](#), cf. Fig. 2a. [Note that the hemispheric background ozone concentrations are assumed constant from 2000 onwards following recent assessments](#)

**Borttaget:** for the modelled year 2000

**Borttaget:** (

**Borttaget:** )

of the evolution of near surface ozone in Europe (e.g. Cooper et al, 2014). CO and NMVOC boundaries are held constant throughout the simulation. The same factor is used for all months of the respective year, although most species also undergo a seasonal cycle in the boundary concentrations used by MATCH (see supplement Fig. S1).

## 2.2.2 Emissions

The version of MATCH utilized in this study needs anthropogenic emissions of sulfur (SO<sub>2</sub> and sulfate), nitrogen oxides (NO and NO<sub>2</sub>), carbon monoxide (CO), non-methane volatile organic compounds (NMVOCs), and NH<sub>3</sub>. The model uses annually accumulated values for each species, which are distributed with different temporal or vertical profiles based on species and sectors.

For countries outside Sweden (as well as international shipping) we utilize the gridded (50 km × 50 km) annual data available at EMEP's web-page (Hjellbrekke and Solberg, 2015; <http://www.emep.int>; downloaded 23 June, 2015). All emission data were split into congruent 5 km × 5 km cells where we replaced the coarse-resolution data over Sweden with the original emission data from SMED (Svensk miljöemissionsdata; <http://www.smed.se>; 1 km × 1 km converted to 5 km × 5 km cells in EMEP's geometry). National totals from SMED are very similar to the national totals available in the EMEP database, but our methodology enables higher resolution emission data over Sweden. The gridded 5 km × 5 km emission data were interpolated to MATCH's 44 km resolution domain during the simulations. [Emissions of biogenic isoprene are calculated online in MATCH following the E-94 isoprene emission methodology proposed by Simpson et al. \(1995\).](#)

Both the total domain and Swedish **national** anthropogenic O<sub>3</sub> precursor emissions decrease strongly over the period 1990-2013 (cf. Fig. 2b). The total domain anthropogenic precursor emissions decrease on average<sup>1</sup> by 1.8 % yr<sup>-1</sup>, 2.4 % yr<sup>-1</sup>, 2.6 % yr<sup>-1</sup> during 1990-2013 for NO<sub>x</sub>, NMVOC and CO respectively, whereas biogenic isoprene emissions (calculated online by MATCH) increase by 0.8 % yr<sup>-1</sup> according to our simulations (cf. Fig 2c). The **national** Swedish emissions decrease by similar amounts (2.4 % yr<sup>-1</sup>, 2.1 % yr<sup>-1</sup> and 2.9 % yr<sup>-1</sup>). The Swedish contribution to the total domain emissions is 1.0 % for NO<sub>x</sub> and 1.7 % for NMVOC

Borttaget: ammonia (

Borttaget: )

Formaterat: Tabbstopp: 12.59 cm,  
Till vänster

<sup>1</sup> The trend is calculated by linear regression over the period 1990-2013 and related to the 1990 emission level.

and CO on the average, with a slight decrease in the relative Swedish contribution over the period for NO<sub>x</sub> (0.01% yr<sup>-1</sup>), and a slight increase for NMVOC and CO (0.01 % yr<sup>-1</sup> and 0.003 % yr<sup>-1</sup> respectively). The amount and spatial distribution of the emissions is updated each year.

**Borttaget:** by the

**Borttaget:** We assume that there is no trend in the temporal intra-annual spatial variation of the emissions.¶

## 2.3 Measurements

Figures 3 and 4 summarize the observations of hourly O<sub>3</sub> concentrations used in the variational analysis and the corresponding hourly data coverage per year in the period 1990-2013. The Swedish observations were delivered by the Swedish data host (at that time, July 1, 2017, Swedish Environmental Institute, IVL). The Norwegian observations were extracted from EBAS (<http://ebas.nilu.no>; extracted on July 6, 2017). All sites except Norr Malma and Rödeby are classified as regional background measurement sites by EMEP (Internet URL: <http://www.nilu.no/projects/ccc/emepdata.html>; Hjellbrekke and Solberg, 2015). Norr Malma is located ca 70 km north-east of Stockholm and is considered a regional background measurement site by Stockholm Air and Noice (<http://slb.nu>), who are responsible for the site. Rödeby is located 10 km north of the small town Karlskrona, and is considered a rural location (personal communication with Titus Kyrklund, Swedish EPA). The sites included are all instrumentation sites, where O<sub>3</sub> is measured continuously and reported with hourly temporal resolution. The retrospective variational data analysis is conducted on hourly resolution, which means that measurements with a coarser time resolution, such as diffusive samplers, are not included in the variational technique. Two measurement data sets were compiled (see Table 1):

**Borttaget:** These measurements represent the regional background in Sweden and Norway

**Borttaget:** assimilation

- The first set includes data from all available instrumentation sites in Sweden, and a selection in Norway based on data availability, quality and location. These are all the red and blue sites in Figs. 3 and 4 also including years where the data capture is lower than 80 %. The reanalysis based on these measurement data is called ALL.
- The second data set includes data from instrumentation sites for which the data coverage exceeds 80 % for at least 23 out of the 24 years. These are the red sites in Figs. 3 and 4. The reanalysis based on these measurement data is called LONGTERM. Råö is seen as the replacement for the site Rörvik, and therefore these sites form a pair, which is included in this data set. Birkenes I was replaced by Birkenes II in 2009,

and the two sites were run in parallel for a few years. We choose to include Birkenes II from 2010 and onwards. The reason for the change of site location is that Birkenes I was influenced by local effects, (personal communication with Sverre Solberg, NILU). The inclusion of these two sites could introduce an abrupt change in the reanalysis, but since it is outside the main focus area (Sweden) and mainly during night we choose to include the site in the LONGTERM reanalysis.

The two measurement data sets are input to two otherwise similar variational data analyses. The ALL-reanalysis is our best estimate of gridded near-surface O<sub>3</sub> over Sweden for a given time. The LONGTERM-reanalysis is used for trend and statistical analyses. We return to whether these reanalyses differ in Sect. 3.1.

## 2.4 Variational data analysis

The spatial analysis problem can be formulated as how to best distribute observational information at a discrete number of locations to a spatially consistent field. We have adopted the 2dvar approach, which includes a modelled background field (from a CTM simulation, “first guess”) combined with available in situ observations (Robertson and Kahnert, 2007), as indicated in Fig. 1. With this method the error estimates of both the background field and the observations play a central role. The observational errors are assumed independent and uncorrelated, while the background errors have spatial correlations that form a background error matrix. The solution is found by the best combination of the background field and observations given their respective error estimates. This can be described as a variational problem, defined by a cost function,

$$J(x) = 0.5 [x - x^b]^T \mathbf{B}^{-1} [x - x^b] + 0.5 [y - \mathbf{H}(x)]^T \mathbf{O}^{-1} [y - \mathbf{H}(x)]$$

where  $x$  is the state to be found (the reanalysis),  $x^b$  the background state (our “first guess”),  $y$  the vector of observations,  $\mathbf{H}$  is the observation operator, and  $\mathbf{B}$  and  $\mathbf{O}$  are the error covariance matrices of the background field and the observations, respectively. In order to find the optimal solution the cost function is stepwise minimized by a variational method, starting with  $x = x^b$ , and ending with the state  $x$ , which represents the optimal balance between the two terms. During the process the co-variances in the  $\mathbf{B}$  matrix acts to extrapolate the observational information in space.

**Borttaget:** ,

**Borttaget:** such as night-time inversions

**Borttaget:** artificial

**Borttaget:** trend

**Borttaget:** assimilations

**Borttaget:** This is because changes in the number of sites and data coverage in the ALL data set can introduce artificial trends due to model biases being corrected by observations included in the later part of the period but not in the first.

**Borttaget:** D

**Borttaget:** assimilation



1 We restrict our study to reanalyze near-surface O<sub>3</sub> on the regional background scale, which  
 2 means we only include regional background measurement sites. We also restrict our study to  
 3 2dvar, rather than using higher dimensional variational analysis. The background covariance  
 4 matrix is modelled in a simplified fashion with a constant background error, 20 times larger  
 5 than the observation error, and Gaussian spatial correlations with a length scale of 1000 km.  
 6 This implies a strong weight towards the observations and assuming a rather large horizontal  
 7 influence of the observations.

**Borttaget:** , which is related to the rather sparse network of regional background observations and the relatively small emissions of O<sub>3</sub> precursors in Sweden resulting in weak horizontal gradients of near-surface O<sub>3</sub> on the regional background scale.

**Borttaget:** assimilation

8 The variational data analysis was conducted on a 22 km resolution grid with hourly temporal  
 9 resolution, combining the modelled “first guess” for near-surface O<sub>3</sub> (the MATCH base case  
 10 scenario, MFG in Table 1) and regional background measurements. Two 24-year reanalyses  
 11 were formed, using the two different sets of hourly measurement described in Sect. 2.3 (ALL  
 12 and LONGTERM in Table 1). If an included measurement site was lacking an observation for  
 13 a specific hour, the site was excluded from the variational data analysis for that specific hour.

**Borttaget:** assimilation

14 The resulting spatially resolved hourly O<sub>3</sub> data are used to form annual and seasonal statistical  
 15 metrics for O<sub>3</sub>, such as the mean value and the maximum 1-hour mean value, and annual  
 16 policy and impact related metrics (cf. Fig. 1). We analyze these annual and seasonal data for  
 17 the 1990-2013 mean, trend and extreme values in Sect. 3.2 (annual/seasonal mean and  
 18 maximum) and Sect. 3.4 (health and vegetation impact metrics).

19

## 20 2.5 Understanding the trends

21 We include also a quantification of the causes to the trend in near-surface O<sub>3</sub> concentration.  
 22 For this investigation we conduct model simulations with MATCH, *excluding* variational  
 23 *data* analysis. We investigate the respective contributions to the modelled total trend due to

**Formaterat:** Teckensnitt: Kursiv

**Borttaget:** assimilation

24 A. Change in emissions, which is separated between

- 25 ○ Swedish anthropogenic emissions (SE emis)
- 26 ○ Full domain (see Fig. 1b), non-Swedish anthropogenic emissions (FD emis)

**Borttaget:** e

**Borttaget:** European

**Borttaget:** full domain)

**Borttaget:** Eur

27 B. Change in lateral and upper boundaries (bound)

28 C. Change in meteorology, including online modelled biogenic isoprene emissions  
 29 (meteo)

Four sensitivity simulations are conducted; in which each of the four listed factors are kept constant at their level in 2011. The respective contributions presented in Sect. 3.3 are formed through the following sequence: 1. Calculation of gridded metrics (focusing on monthly 1h maximum, monthly mean and annual 1h percentile levels); 2. Calculation of secular gridded trends over the monthly or annual metrics; 3. Calculation of regional (North, Central, South, cf. Fig. 3) mean of the secular trends, 4. Calculation of the difference between the regional mean trend in MFG and the corresponding sensitivity simulation. All model simulations and scenarios are described in Table 1a. The method of forming the contributions from these simulations is shown in Table 1b.

There are three critical points in the investigation of the causes of the trend: First, this quantification methodology assumes linearity, whereas the sum of contributions (SUM) is not necessarily equal to the trend in the MFG simulation. If they are not equal, this means that the simulations are non-additive. This could occur when changes to mixtures of complex chemistry, weather situations and emissions take place, or as a numeric effect in the model. For this reason we compare the sum of the trend in the estimated contributions to the MFG trend. Second, our methodology quantifies the contributions to the trend in the MFG simulation, which may differ from the reanalyzed trend. Thus we will compare the reanalyzed trend and the MFG trend to make sure the base case simulation does not deviate too strongly from the reanalysis results. If the deviation is large, i.e. the modelled trend is far from the observed, this means that the MFG simulation is non-representative. Such discrepancies could arise from over-sensitivity in MATCH to one process and insensitivity to another, compared to the real world, or imperfections/artificial trends in the input data such as erroneously estimated emissions or erroneous assumptions on the trend in hemispheric background concentrations. If either is true (non-additive or non-representative) for the trend in a specific metric, then our method cannot be used to explain that specific trend. Third, the attribution may be sensitive to the chosen base year. Sensitivity simulations using 1990 as base year instead of 2011 are also conducted, to investigate the robustness of the results. To investigate all 24 years as base years would take too much computational efforts, we choose 1990 as it differs from 2011 both for European emissions and climatologically<sup>2</sup>. If the contributions to

<sup>2</sup> The NAO index was high in early winter 1990 and low in 2011, whereas the summer index was positive but close to 0 in 1990 and negative in 2011.

**Borttaget:** processes

**Borttaget:** the

**Borttaget:** The respective contributions to the trend are formed by subtracting the MFG with the corresponding sensitivity simulation.

**Borttaget:** ¶

**Borttaget:** two

**Borttaget:** is

**Borttaget:** we

**Borttaget:** y

**Borttaget:** base case

**Borttaget:** too

**Borttaget:** it

**Borttaget:** representative

**Borttaget:** additive

**Borttaget:** ,

**Borttaget:** such as the trend in the January mean,

**Formaterat:** Teckensnitt: Inte Kursiv

**Formaterat:** Teckensnitt: 10 pt, Inte Kursiv

the trend differ too much between the base years 1990 and 2011 then the results are not robust. If they are similar it is not a guarantee that the results are robust but it is an indication. The contributions with 1990 as base year are formed in the same way as for the 2011 sensitivity runs. The contributions due to change in top and lateral boundaries (bound) and variations in meteorology are included in the same manner, while we compare the total footprint of the change in emissions, i.e. the sum of FD emis and SE emis (emis) rather than the two parts.

## 2.6 Evaluation

We evaluate two aspects of the reanalysis. The first is an independent evaluation for a single year with focus on the variational data analysis method. The second is an evaluation of the simulated near-surface O<sub>3</sub> concentration trend over the 24-year period and our ability to explain the causes of the trend.

For an independent evaluation of the variational data analysis method we conduct a cross validation at the included Swedish measurement sites. In this method we exclude one measurement site at a time from the variational data analysis, and evaluate the results at the excluded location. This means we conduct one 2dvar simulation for each considered measurement site. Due to the large amount of computation involved we evaluate one year only by this method. We choose the year 2013, which is when the data coverage is the largest. This means that we have the opportunity also to investigate whether we see any difference in performance between the reanalysis with the larger number of measurement sites (ALL) and the long-term reanalysis (LONGTERM). The evaluation metrics used here are mean value (mean), standard deviation ( $\sigma$ ), model mean bias normalized by the observed mean (%bias), Pearson correlation coefficient ( $r$ ) and the root mean square error (RMSE), see Supplement Sect. S1.

For the evaluation of the long-term trend we focus on the three critical points raised in the previous section: 1/ the additivity of the trend in the contributions as compared to the trend in O<sub>3</sub> concentration from the MFG simulation, and 2/ whether the MFG trend is representative of the O<sub>3</sub> concentration trend in the LONGTERM reanalysis results and 3/ whether the contributions to the secular trend are sensitive to base year. We focus this investigation on 11 different percentiles of hourly mean O<sub>3</sub> concentrations, for an estimate of the scores at

Borttaget: assimilation

Borttaget: assimilation

Borttaget: With

Borttaget: assimilation

Borttaget: use the analysis

Borttaget: from

Borttaget: in the evaluation of all sites

Borttaget: such

Borttaget: two

different concentration levels. We focus specifically on averages over the three Swedish regions North, Central and South (cf. Fig. 3), to investigate whether there is any variation in performance in Sweden.

Additional evaluation and comparisons of the temporal variation over the whole period is included in the Supplements for the two reanalyzes LONGTERM and ALL, the MATCH simulation MFG and observed annual mean (see Supplement Sect. S2 and Figs. S2-S4 and Table S1).

**Borttaget:** The comparisons are presented as scatterplots in Fig. 5 and compared to the 1:1 line, factor 2 line and equal sign quadrants.

### 3 Results

#### 3.1 The performance of the model simulations and reanalyzes

Before turning to the evaluation results, we investigate whether the two ozone reanalyzes differ. We do this by comparing time series of annual O<sub>3</sub> metrics for the two data sets. The investigation is presented in the Supplements and shows deviations in the latter years as the number of sites in the ALL data set increases beyond the sites included in the LONGTERM data set (see Supplement Sect. S3 and Figs. S2-S4). The deviation in annual mean near-surface O<sub>3</sub> concentration is larger than for annual maximum 1 hour mean given that many of the newer sites are sensitive to night-time inversions. Due to the visible deviation in results, we use the LONGTERM for the trend and statistical analyzes in the paper, whereas both are used for the evaluation of the 2dvar-method in this section. Both are included in the method evaluation because the evaluation scores may be dependent on the density and specific locations of the measurement sites. The ALL data set is to be used as a best estimate of geographically resolved near-surface O<sub>3</sub> concentrations for Sweden for a subset period within the full period 1990-2013.

In Table 2 we show the evaluation statistics from the validation of hourly and daily maximum of hourly mean near-surface O<sub>3</sub> in 2013. The near-surface O<sub>3</sub> concentrations from the MFG simulation compare well with observations, and the 2dvar-technique leads to improvements. The spatially averaged correlation coefficient of hourly near-surface O<sub>3</sub> concentrations (see Supplement Sect S1 increases from 0.67 when comparing the MFG O<sub>3</sub> concentrations to observations, to 0.76 when comparing the ALL reanalysis independently to observations through a cross validation (Table 2). The %bias decreases from 1.4 to -0.3 and the RMSE is also improved in the independent evaluation of the ALL reanalysis. Similar improvements are

also obtained when using fewer measurements (LONGTERM, Table 2), showing that the method is stable with the number of measurement sites. The cross validation spatial error (RMSE) is however larger than that obtained when evaluating the MFG simulation against independent observations, where the cross validation results indicates that the 2dvar reduces the quality of the annual mean spatial variation in 2013. The evaluation of the daily maximum generally shows better correlation but slightly larger bias than the evaluation of the hourly mean. The spatial correlation is also worse in the cross validation compared to the MFG, but the spatial error is improved. Overall, the independent cross validation shows that the 2dvar method improves the performance of the modelled hourly mean and daily maximum O<sub>3</sub> compared to the MFG simulation. This is true not only in the measurement sites, but also elsewhere, with exception for the spatial variation.

In Fig. 5 we compare regionally averaged linear trends in annual percentiles (levels: 0, 2, 5, 10, 25, 50, 75, 90, 95, 98 and 100) of hourly near-surface O<sub>3</sub> over the period 1990-2013 for the MFG simulation, the LONGTERM reanalysis, the sum of contributions and the contributions to the trend for different base years. Investigating the additivity of the four contributions (bound, meteo, SE emis and FD emis), we compare the O<sub>3</sub> concentration trends in the MFG simulation to the trend in the sum of the contributions (SUM, Fig. 5a). Almost all values fall close to the 1:1 line. Only a few of the very weakest O<sub>3</sub> trends fall outside the factor 2 lines. Thus, the contribution experiment can be used to explain the MFG O<sub>3</sub> trend. Comparing the LONGTERM and MFG trends in near-surface O<sub>3</sub> (Fig. 5b), the values are within a factor of 2 for most percentiles and regions. There is a general tendency for the positive MFG trends to be stronger than the reanalyzed trend (LONGTERM). The largest deviations in the O<sub>3</sub> trends are in the North and the relationship between these two is not as linear as in the other two regions. Most of these trends are however not significant. This demonstrates the added value of the measurement model fusion, where errors in the modelled trend are corrected by the analysis. The deviations are small enough to conclude that in most cases the MFG is representative, showing that the MATCH model can be used to understand the trends in the LONGTERM data set. Finally, investigating the impact of the selected base year in the sensitivity simulations, we compare the contributions (bound, emis and meteo) based on keeping the year 2011 constant in the sensitivity simulations to keeping the year 1990 constant (Fig. 5c). Most contributions to the trend in percentiles are robust (Fig. 5c), falling close to the 1:1 line. Only a few of the very weakest O<sub>3</sub> contribution trends fall outside the factor 2 lines (for the meteo contribution). The contributions to the secular trend in some

**Borttaget:** The lowest annual means in 2013 (Supplement Table S2) are found in the sites Rödeby, Aspvreten, Östad, Norr Malma and Asa, where the annual means are below 30 ppb(v). The highest annual means are found in Esrange, Norra Kvill, Råö and Vavihill. This is likely caused by strong night-time inversions in the sites with lower annual means. These night-time inversions depend to a large extent on local topography, and are not uncommon in inland sites positioned at a low altitude in the local landscape compared to the average of the surrounding area. This variation occurs at a higher resolution than is captured by the MFG simulation (44km resolution). Simultaneously the correction of the model by the data assimilation based on the differences between the model and the measurements, results in readjustments of the model results for the surrounding area and specifically for other sites not affected by night-time inversions. This is illustrated in the Supplements (Fig. S5).

**Borttaget:** hourly mean

**Borttaget:** in annual mean

**Borttaget:** the

**Borttaget:** percentiles

**Borttaget:** and

**Borttaget:** c

**Borttaget:** Eur

of the monthly mean and the monthly maximum 1h mean near-surface O<sub>3</sub> differ more for the two base years than the percentiles (Supplements, Fig. S5). For monthly mean the trend due to changes in meteorology is stronger for some months (one month is weaker) when 2011 is used as base year compared to 1990. The other contributions fall within the factor 2 lines. For monthly maximum the deviation is larger, even differing in sign for the contribution due to variation in meteorology for some months, and a few contributions due to emission change also fall outside the factor 2 lines.

Formaterat: Nedsänkt

In conclusion we have shown that the MFG performs well for hourly near-surface O<sub>3</sub> concentration and the 2dvar analysis improves the performance to almost perfect correspondence to the measurements in the measurement locations, and improved performance elsewhere (cf. the cross-validation), with the exception of the spatial variation. There is an added value of a reanalysis when investigating the trend of near-surface O<sub>3</sub> concentrations. The MATCH model can be used to investigate the causes to the reanalyzed O<sub>3</sub> trend, but for the contribution of meteorology to the monthly maximum is not robust under the choice of base year for all months. In the North the trends in the reanalyzed and the MFG O<sub>3</sub> concentration deviates by more than a factor of 2 for some percentiles. We will focus on this deviation more in the final discussion (Sect. 4).

### 3.2 Reanalyzed near-surface ozone in Sweden 1990-2013

The mean 1990-2013 seasonal variations in monthly mean and monthly maximum of 1h mean near-surface O<sub>3</sub> are presented in Fig. 6, averaged over the three regions: North, Central and South (as defined in Fig. 3). The seasonal variation in the linear trend of the spatially averaged monthly values is also included in the figure. Spatially resolved statistics for annual mean and annual maximum of 1h mean near-surface O<sub>3</sub> are provided in Fig. 7. The temporal evolution of 11 percentile levels from the 0<sup>th</sup> (annual minimum 1h mean) to the 100<sup>th</sup> (annual maximum 1h mean) are shown in Fig. 8, and the corresponding trends with indication of significance levels are recaptured in the Supplements (Table S2).

Borttaget: in

Borttaget: Time series of annual percentiles averaged over the three regions are shown in Fig. 8.

#### 3.2.1 1990-2013 period statistics

The near-surface O<sub>3</sub> in Sweden exhibits a seasonal variation, which peaks during spring (Fig. 6). In the North the seasonal maximum concentration occurs in April, whereas it occurs later,

in May, in the regions further south. The earlier peak in the North, as compared to the South, was also shown by Klingberg et al. (2009) for in situ observations. In the North, the seasonal peak in monthly mean O<sub>3</sub> concentration is higher than the corresponding seasonal peaks in the other two regions, and this is a feature throughout the whole winter half-year: the monthly mean O<sub>3</sub> concentrations are higher in the North than the more southerly regions during October-April. During the summer, the monthly means are higher in the South than in the other two regions. This leads to a 24-year period mean value (Fig. 7) that is highest in the northerly mountains and lowest in central Sweden. This pattern is also supported by Klingberg et al. (2009) based purely on observations, but including a larger number of observation sites through the inclusion of passive diffusion samplers.

For the period mean seasonal variation in monthly maximum 1h mean near-surface O<sub>3</sub> (Fig. 6b) there is a similar seasonal peak in April-May, but there is also a secondary peak during summer (in August). The further south the higher is the monthly maximum 1h mean near-surface O<sub>3</sub> during March-October. This applies to both the primary and the secondary seasonal peaks in monthly maximum. The 24-year period mean of the annual maximum of 1h mean near-surface O<sub>3</sub> (Fig. 7) is lower in central Sweden than in the South and the North, and it is highest in the South.

The lower period mean of the near-surface O<sub>3</sub> in the south than in the north is mainly caused by the higher altitude of the latter, mountainous, region whereas the opposite gradient for the annual maximum 1h mean is caused by the distance to continental Europe where the high ozone events originate from. The difference in spatial pattern between the southern, central and northern parts of Sweden is why we choose the three regions defined in Fig. 3. The period maximum of the annual means and period maximum 1h mean near-surface O<sub>3</sub> concentrations have similar spatial variation as their respective period means (Fig. 7). The overall 24-year maximum 1h mean near-surface O<sub>3</sub> reaches above 240 µg m<sup>-3</sup> in isolated parts of the South, and is generally above 180 µg m<sup>-3</sup> in the south and 130 µg m<sup>-3</sup> in the central and northern part of Sweden.

### 3.2.2 Trend over the period

Seasonal variations are also present in the trend of both monthly mean and monthly maximum 1h mean near-surface O<sub>3</sub> concentrations (Fig. 6). Monthly means increase strongly during winter and spring (approx. Nov-April), and decrease moderately (North) or strongly (Central

**Borttaget:** S

**Borttaget:** N

**Borttaget:** erly mountains

**Borttaget:** possibly

**Borttaget:** night-time inversions at some of the southerly sites

**Borttaget:** and also therefore the reason for

**Borttaget:** as compared to the annual mean

**Borttaget:** .



and South) during summer (May-Aug). The trends in monthly maximum 1h mean follow a similar pattern. Generally, the rate of change is stronger or at the same level in the Central and South as compared to the North. The strongest decrease is in the August maximum 1h mean in the South and Central, and the strongest increase is in the March monthly mean in the Central and North.

The annual mean near-surface O<sub>3</sub> (Fig. 7d,e) increases almost everywhere in Sweden over the time period. The trend is however only significant in restricted parts of Central and South regions, due to considerable inter-annual variation in the areas with the highest trend. The annual maximum 1h mean near-surface O<sub>3</sub> (Fig. 7i,j) is significantly decreasing in South and Central regions, whereas the change in the North is a mixture of increase and decrease, and it is without significance in most areas.

We proceed by investigating the trend in annual percentiles (Fig. 8) of hourly near-surface O<sub>3</sub> concentration, averaged<sup>3</sup> over the three Swedish regions (cf. Fig. 3). In all three regions the low and medium percentiles are increasing, while the highest percentiles are decreasing from 1990 until 2013. This was also shown by Simpson et al. (2014) based on observations for northern Europe and based on observations for Europe, US and East Asia by Lefohn et al. (2017). Further, using hourly O<sub>3</sub> observations, Karlsson et al. (2017) showed that reduced concentrations in northern Europe were restricted to the highest O<sub>3</sub> concentrations during summer daytime, while the increase in low and mid-range concentrations occurred during wintertime at both day and night.

In Central and South regions the decrease in the highest near-surface O<sub>3</sub> percentiles are significant and stronger than in the North, and this decrease is evident throughout the maximum 10% percentile range (although the change is not significant for the 90<sup>th</sup> and 95<sup>th</sup> percentile levels; cf. Fig 3). This change is mainly caused by decreased high values during the summer-time. In the North, only the annual maximum 1h mean is decreasing and the inter-annual variability is stronger than the rate of change, indicated by the lack of significance for this percentile. The medium and low percentile increase in the North is moderate, but significant, for most percentiles up to the 95<sup>th</sup>, with very similar rates of change. In the Central and South the change in the low percentiles is highly significant and stronger than in

**Borttaget:** The day of the year when the annual maximum 1h mean near-surface O<sub>3</sub> occurs shifts to earlier in the year in the later part of the period, although there is large inter-annual variation, which is stronger in the South than in the North (Supplements Fig. S6).

**Borttaget:** The decrease in the South and Central annual maximum 1h mean is a result of the strong decrease in the summer-time O<sub>3</sub> maximum; in the beginning of the 24-year period, the southern summer-time maximum is more often the annual peak rather than the spring-time maximum, whereas the summer-time maximum is more often secondary to the annual maximum in the end of the period. The annual maximum 1h mean is shifted to earlier in the year (Supplements Fig. S6). In a study of four rural European sites and one in western United States, Parrish et al. (2013) showed that not only are springtime O<sub>3</sub> concentrations larger in recent years than in earlier decades, but also that the seasonal maximum now also occurs earlier, as in our results for Sweden. This change in seasonal cycle is also supported by the work by Cooper et al. (2014). The change in the annual maximum 1h mean near-surface O<sub>3</sub> from summer-time peak to spring-time peak means that more than one process can be the cause of the change (increasing spring-time and decreasing summer-time).

**Borttaget:** The temporal evolution of 11 percentile levels from the 0<sup>th</sup> (annual minimum 1h mean) to the 100<sup>th</sup> (annual maximum 1h mean) are shown in Fig. 8, and the corresponding trends with indication of significance levels are recaptured in the Supplements (Table S3).

**Borttaget:** and significant a

<sup>3</sup> The percentile is calculated per grid square for all hours in each year, then regional mean annual percentiles are calculated and finally the trend is calculated based on these averaged percentiles.

1 the North. This is an indication that the increase in low near-surface O<sub>3</sub> concentrations cannot  
 2 only be explained by increasing background. As a result of the decrease of high and increases  
 3 of low percentiles, there has been a narrowing of the range of the near-surface O<sub>3</sub>  
 4 concentrations over the period. This was also observed in the UK by Jenkin (2008) for 1990  
 5 until the early 2000s and in the US by Simon et al. (2015) for 1998-2013, both studying urban  
 6 and regional background measurements across the respective countries. Jenkin (2008)  
 7 interpret it as caused by three major influences: i/ increasing hemispheric background, ii/  
 8 decreasing severity in high ozone events arising from the European continent and iii/  
 9 decreasing local-scale removal of ozone due the control of NO<sub>x</sub> emissions. Simon et al (2015)  
 10 interpret the US evolution as a response to the substantial decrease in O<sub>3</sub> precursor emissions  
 11 in the US over the time period. Decreased primary NO emissions results in decreased O<sub>3</sub>  
 12 titration close to combustion sources, but also reduces local O<sub>3</sub> further away from the  
 13 emissions sources when there is little photolysis (especially in the winter and during night-  
 14 time). In the next section we investigate the impact of Swedish and European emission  
 15 decrease over the period, and relate this to the impact of change in the chemical composition  
 16 of the hemispheric background and meteorological variations.

**Borttaget:** US

**Borttaget:** They

**Borttaget:** is

**Borttaget:** under weather states favorable  
for O<sub>3</sub> formation

### 18 3.3 Attribution of the change in near-surface ozone

19 In this section we quantify the contributions of physical factors to the modelled trend of near-  
 20 surface O<sub>3</sub> concentration in Sweden during the period 1990-2013. We investigate the impact  
 21 of the trend in lateral and upper boundaries, meteorological variations and Swedish and  
 22 European (i.e. full domain, non-Swedish) anthropogenic emission change. In Figs. 9 and 10  
 23 the contributions to the trend in seasonal variations and percentiles are delineated for the  
 24 North and South regions.

**Borttaget:** processes

**Borttaget:** , full domain

**Borttaget:** quantified

25 We start our attribution by analyzing the impact of changing hemispheric background levels  
 26 of relevant chemical species ("bound" bars in Figs. 9 and 10). These contribute to an increase  
 27 in monthly mean and maximum 1h mean throughout the year and for all percentiles, mainly  
 28 as a result of our assumption of an increasing O<sub>3</sub> concentration trend in the lateral and upper  
 29 boundaries during the 1990s and constant boundary conditions for O<sub>3</sub> during the rest of the  
 30 period. There is a seasonal variation in the trend of the boundary contribution, with lower  
 31 impact during summer. This variation is likely a result of an O<sub>3</sub> destruction process that is

**Borttaget:** show

**Borttaget:** a minimum

1 stronger during summer than winter, such as dry deposition to vegetation and photolysis of  
2 ozone. The seasonal variation in the contribution to the trend from the boundary impacts both  
3 monthly mean and maximum 1h mean. Our representation of the trend in the concentration of  
4 species at the model domain boundary is climatological. The climatological upper boundary  
5 means that the inter-annual variations in near-surface O<sub>3</sub> are likely underestimated in remote  
6 locations. The impact on inter-annual variations may be largest at high altitudes or far away  
7 from the major anthropogenic sources. Hess and Zbinden (2013) showed the importance of  
8 the stratospheric contribution to the inter-annual variation at Mace Head and Jungfraujoch; it  
9 is possibly also important in the north of Sweden, especially in the mountainous areas. Such  
10 variation is not captured by the boundary settings, but it is indirectly included in the  
11 reanalyzes data sets through the variation in the measurements included in the variational data  
12 analysis. As a consequence, the MFG and “bound” simulations underestimate the inter-  
13 annual variability as compared to observations and the reanalysis (cf. Table 2), and this could  
14 also affect the “bound” trend.

**Borttaget:** assimilation

15 The impact of meteorological low-frequency variations (“meteo”) during the 24 years is also  
16 an important factor, but more difficult to interpret. The meteorological variation acts to cause  
17 a positive trend in near-surface O<sub>3</sub> concentration for most monthly means and maxima, as  
18 well as for most percentiles. Note the shift from a generally strong positive contribution to a  
19 strong negative contribution from the 98<sup>th</sup> percentile to the 100<sup>th</sup> percentile in the South. The  
20 meteorological influence on the trend is as large as the impact of the change in boundary, for  
21 most percentile levels in the South, while it is weaker for most percentile levels in the North.

**Borttaget:** strong

**Formaterat:** Upphöjd

**Formaterat:** Upphöjd

22 During the period 1990-2013 both European (full domain, non-Swedish) and Swedish  
23 emissions have decreased strongly. There is a strong seasonality in the impact of the  
24 decreasing European emissions, and the contribution to the trend of the Swedish emissions  
25 follows the same pattern but with smaller magnitude (cf. Fig. 9, “FD emis” and “SE emis”  
26 respectively). During summer the decreasing emissions have acted to lower both the monthly  
27 mean and maximum 1h mean. During winter the trend in monthly maximum 1h mean is  
28 unaffected by the change in emissions, indicating that the highest near-surface O<sub>3</sub>  
29 concentrations during winter are due to other sources than local O<sub>3</sub> production. Emission  
30 decreases have acted to cause increases in monthly mean near-surface O<sub>3</sub> concentrations in  
31 the winter, due to reduced O<sub>3</sub> destruction by primary NO emission. Trends in percentiles (Fig.  
32 10), show that the emission decrease has caused decreases to percentiles higher than the 50<sup>th</sup>

**Borttaget:** Eur

**Borttaget:** e

level, and increases below. The impact is stronger in the South than in the North, which is expected due to the South being closer to the European continent. The contribution of the trend in emissions is often stronger than the changing boundary, e.g. in the South for most percentiles and for monthly maximum 1h mean during the summer half-year in both regions. Thus, the observed increase in low and medium near-surface O<sub>3</sub> levels is caused by a mixture of both changes to the hemispheric background levels and emission reductions of O<sub>3</sub> precursors, while the decrease in the high percentile levels is mainly caused by emission decrease.

### 3.4 Implications for health and vegetation impacts

For the protection of vegetation, the target value by EU (EU directive 2008/50/EC) states that the 5-year mean AOT40 (near-surface O<sub>3</sub> concentration above 40 ppb(v) accumulated over May-July; AOT40c) must not exceed 9 ppm(v) h, and as a long-term goal AOT40c must not exceed 3 ppm(v) h during a calendar year. For protection of human health the target value by EU (EU directive 2008/50/EC) states that the daily maximum running 8 hour mean near-surface O<sub>3</sub> concentration must not exceed 120 µg m<sup>-3</sup> more than 25 days per year as a 3-year mean, and as a long-term goal the daily maximum of 8h mean near-surface O<sub>3</sub> concentration must not exceed 120 µg m<sup>-3</sup> at all. Sweden has formulated 16 environmental quality objectives, including clean air, alongside specifications to help reach these objectives. The following specifications are currently valid for near-surface O<sub>3</sub> concentration in Sweden (NV, 2015): the hourly mean must not exceed 80 µg m<sup>-3</sup>, the daily maximum 8h mean must not exceed 70 µg m<sup>-3</sup> and AOT40f (O<sub>3</sub> concentration above 40 ppb(v) accumulated over April-September) must not exceed 5 ppm(v) h. SOMO35 (the Sum of Ozone Means<sup>4</sup> Over 35 ppb(v)) is used as a metric describing human exposure. The cut-off value of 35 ppb(v) is often used in risk assessments as a statistically significant increase in mortality has been observed at daily ozone concentrations >25-35 ppb(v) (Bell et al., 2006; Amann et al., 2008; Orru et al., 2013). In Table 3 we present the linear trends in our reanalysis data set for these metrics, and

---

<sup>4</sup> For SOMO35 the Mean is defined as the daily maximum of running 8h mean near-surface O<sub>3</sub> concentrations and the accumulation is over a year unless otherwise is stated.

have collected geographically resolved statistics, such as the period mean, maximum and linear trend in the Supplements (Figs. S6-S10).

The narrowing of the O<sub>3</sub> concentration range, especially through increasing lower percentiles, can impact human and vegetation exposure to O<sub>3</sub>. The effect metrics based on accumulation of values above a threshold (AOT40c; AOT40f; SOMO35) and the number of days with daily maximum of 8h mean near-surface O<sub>3</sub> concentration exceeding 120 µg m<sup>-3</sup> have been decreasing over the period in the South and Central regions, as have the highest values in the year. This is in accordance with the decrease in the highest percentiles in these regions (cf. Supplements Table S2). Conversely, the metrics with lower threshold values increase, such as the number of hours exceeding 80 µg m<sup>-3</sup> and the number of days with daily maximum 8h mean near-surface O<sub>3</sub> concentration exceeding 70 µg m<sup>-3</sup>. This increase is significant in the North, whilst it is not significant in the South and Central. This agrees with the change in medium and low percentiles. A continued increase in low values would cause a continued increase in these metrics, and would eventually reverse the decreasing trend to an increase. This is valid specifically for those metrics with accumulation of values or higher thresholds, such as SOMO35 and AOT40c.

#### 4 Discussion

This work improves upon previous studies by investigating the trends in near-surface O<sub>3</sub> concentration via a combination of both observed and modelled data. The respective advantages of modeling (geographical and temporal coverage) and observations (the most reliable O<sub>3</sub> concentration estimate at a discreet point) can be exploited through variational data analysis to reach a greater understanding of the atmospheric state, and the model can further be used as a tool to explain what is described.

Our results should, however, also be viewed in the context of their limitations. The length scale of the variational data analysis is set to 1000 km, implying a large horizontal influence of the observation increments. This is related to the sparse network of regional background observations but also the relatively small emissions of O<sub>3</sub> precursors in Sweden resulting in weak horizontal gradients of near-surface O<sub>3</sub> on the regional background scale. The large length scale is also a filtering of local influences in the observations, consequently suppressing sharp gradients in the analysis. However, the horizontal variation in near-surface

**Borttaget:** 7

**Borttaget:** 1

**Borttaget:** , Sum of Ozone Means<sup>5</sup> Over 35 ppb(v)

**Borttaget:** 3

**Borttaget:** The highest near-surface O<sub>3</sub> concentrations, associated with short-term (acute) health impacts, show a clear and significant decrease in the South (where the highest values occur), leading to an improvement in health impacts. For long-term health effects, there is no established threshold below which there are no adverse effects, even if SOMO35 often is used. The increase in low values (and e.g. the annual mean) has negative impacts on health, although SOMO35 is decreasing in the South and Central Sweden. This increase is also of concern given that policy choices will cause further reductions in local NO emissions – which are highly correlated to where people reside – thus increasing the sensitivity of O<sub>3</sub> to the background and hemispheric background level. Despite this, the solution is not to reverse policies that reduce local NO production, given that this would negatively impact both the highest values and the hemispheric background. A solution must therefore be sought via international policy regulations.¶

**Borttaget:** knowledge.

**Borttaget:** assimilation

ozone is larger in the south than in the north, and the large length scale chosen in the data analysis may cause too weak horizontal gradients in the reanalysis data set, especially in the south. An improvement to this would be to describe the geographical variation of near-surface ozone in the background error field, rather than representing this by a constant value as done in this study. The model simulations have a relatively coarse horizontal resolution, meaning that processes that are more local in origin are not captured by the model – these include the role of local topography or coastal climate for the night-time boundary layer stability (Klingberg et al., 2011), or local emission sources. As a result, the variational data analysis scheme will spread such features to parts of the model results where they are not valid. Some of the southerly sites in the variational data analysis are known to experience night-time inversions with associated depletion of near-surface O<sub>3</sub> and the reanalysis will thus be affected by this. Introducing a geographically varying length scale and background error in the variational data analysis and an improvement in the spatial resolution of the model would improve the spatial representation of the analysis, the latter since the difference between observation and model has the potential to decrease at these observation sites.

As with all modeling studies, the model cannot perform better than the quality of the forcing input data. Knowledge of emissions in the beginning of the 24-year period is less comprehensive than at the end, which could introduce artificial trends to the MFG. The trends in lateral and top boundary conditions are taken from the work by Engardt et al. (2017) and are based on observed trends at regional background location in Europe. The upper boundaries are especially poorly constrained in our study, and as a consequence so is the stratospheric contribution to the inter-annual variation and trend. The variational data analysis reduces the impact at the surface caused by errors in the lateral and upper model boundaries. However, the reanalysis may still be affected in regions with sparse measurement coverage. This can affect the attribution to the trend. In this study the MFG simulation captures the observed (reanalyzed) trend reasonably well, but there is a discrepancy between the reanalysis and MFG trend for most percentile levels in North Sweden. To investigate this in more detail, we have compared the error in trend by percentile (the difference between the trends in MFG and LONGTERM) to the trend caused by the four contributions (bound, meteo, SE emis and FD emis). The resulting figure is included in the Supplements (Fig. S11). There is a 1:1 relation between the impact of the trend in the European emissions and the deviation between the MFG and the LONGTERM trends. This could be caused by overestimation of the European emissions trend. A similar tendency is seen for the Swedish emission contribution

**Borttaget:** assimilation

**Borttaget:** assimilation

**Formaterat:** Nedsänkt

**Borttaget:** We choose however not to exclude these data from the data assimilation, on the basis that this is restricted to occasional events during night-time. An improvement

**Borttaget:** in

**Borttaget:** ¶

**Borttaget:** the lateral boundaries of

**Borttaget:** represented

**Borttaget:** assimilation

**Formaterat:** Teckensnitt: 12 pt

**Borttaget:** of

**Borttaget:** e

**Borttaget:** Eur

**Borttaget:** 2

1 in the Central and South regions. This calls for emission inventories to be improved in order  
2 to assure the trend in ozone precursor emissions is correct. Another reason for this could be  
3 too strong model sensitivity to the European emission trend in the North. If this was true, it  
4 would have implications for sensitivity studies that consider the future development of near-  
5 surface O<sub>3</sub>. In studies relating the impacts of future climate change to future anthropogenic  
6 precursor emission change, a robust conclusion for most models is that the impact on annual  
7 or summer-time mean near-surface O<sub>3</sub> concentration of future precursor emissions is much  
8 stronger than the impact of climate change (e.g. Engardt et al., 2009, Langner et al, 2012b;  
9 Watson et al., 2016). If models are too sensitive to trends in emissions in remote areas,  
10 compared to other processes, such a conclusion might change. Parrish et al. (2014) also  
11 compared observed and modelled trends and found that the three chemistry-climate models  
12 studied failed to reproduce the observed trends – the modelled O<sub>3</sub> concentration trend was  
13 approximately parallel to the estimated trend in anthropogenic precursor emissions of NO<sub>x</sub>,  
14 whilst observed O<sub>3</sub> concentration changes increased more rapidly than these emission  
15 estimates. This implies that there is a lack of knowledge relating to controls of concentrations  
16 of tropospheric O<sub>3</sub>. Whether it is the trend in ozone precursor emissions or the model  
17 sensitivity to emissions that need improving is left for future studies.

18 Our study shows that the impact of meteorological variability on the trend changes strongly  
19 from lower percentile levels to the very highest (in the South), with a shift from a positive to a  
20 negative contribution (cf. Fig. 10). Thus, conclusions drawn on the importance of  
21 meteorological variability in comparison to other factors such as changes in emissions will  
22 vary strongly depending on the metric that is studied. We have also studied the impact of  
23 base year in the sensitivity study (1990 vs 2011; cf. Fig. 5c and Supplement Fig. S5). The  
24 attribution to the trend is robust for all percentiles, including the annual maximum, whereas  
25 the monthly maximum is not robust for emissions and meteorological variation. So far studies  
26 of the future development of near-surface O<sub>3</sub> have focused on long-term means such as  
27 summer mean (e.g. Langner et al, 2012a,b; Watson et al., 2016), whereas the the direction of  
28 cause of high-frequency metrics, such as the higher percentiles we show here, have not been  
29 established and should be investigated further.

30 Finally, we conducted a trend analysis of the reanalyzed near-surface O<sub>3</sub> using linear  
31 regression. We have chosen to present the trend in the LONGTERM data set in all analyzes,  
32 regardless of whether it is statistically significant or not. We stress that a trend contains valid

Borttaget: make

Borttaget: s

Formaterat: Inte Färgöverstrykning

Formaterat: Nedsänkt

Formaterat: Inte Färgöverstrykning

Borttaget:



information even where it is not statistically significant – and it will become significant if the change and variability remains the same over time. We also recognize that there are other methods of investigating the statistical behavior of the data set, and therefore welcome further use of the data, which may be provided upon request from the corresponding author.

Borttaget: accessed

## 5 Conclusions

- We have constructed two hourly reanalyses of near-surface O<sub>3</sub> for Sweden for the period 1990-2013: one time-consistent reanalysis and one using all available hourly measurements. Both data sets are available upon request from the corresponding author.
- We have evaluated the performance of the reanalyzed near-surface O<sub>3</sub> and mainly found improved performance compared to the MATCH model.
- Our results show:
  - High near-surface O<sub>3</sub> concentrations in Sweden are decreasing and low O<sub>3</sub> concentrations are increasing.
  - Health and vegetation impacts due to high near-surface O<sub>3</sub> concentrations (quantified by policy related threshold metrics) have decreased in central and south Sweden as a result of the decrease in the highest ozone values.
  - Decreasing emissions in Europe have led to decreasing summer-time near-surface O<sub>3</sub> concentrations, as well as a decrease of the highest concentrations.
  - The rising low concentrations of near-surface O<sub>3</sub> in Sweden are caused by a combination of rising hemispheric background O<sub>3</sub> concentrations, meteorological variations and O<sub>3</sub> response to European O<sub>3</sub> precursor emission regulation.
  - There is a discrepancy between modelled and observed (reanalyzed) O<sub>3</sub> trends in northern Sweden. This could be caused by erroneous trends in the historical anthropogenic ozone precursor emissions used here or that our model is too sensitive to changes in emissions. If the latter is true, it implies that the evolution of future precursor emissions may have a weaker impact on future

Borttaget: smaller

near-surface O<sub>3</sub> concentrations than shown by earlier studies [\(e.g. Langner et al., 2012a,b; Watson et al., 2016\)](#).

- [The results show that the impact of meteorological variability changes strongly from lower percentiles levels to the very highest in the South. In studies of future development the maximum ozone, and the causes for change in this, should be investigated further.](#)

## Acknowledgements

This project was funded by the Swedish Environmental Protection Agency (EPA), through funding directly to the reanalysis (contract no. 2251-14-016) and through the research program Swedish Clean Air and Climate (SCAC) and NordForsk through the research programme Nordic WelfAir (grant no. 75007). The annual mapping with the MATCH Sweden system is funded by the Swedish EPA.

Thank you to Sverre Solberg (NILU, Norway) for all help, especially with the selection of Norwegian observation sites.

## References

Akimoto, H.: Global air quality and pollution, *Science*, 302, 1716-1719, doi:10.1126/science.1092666, 2003.

Alpfjörd, H. and Andersson, C.: Nationell miljöövervakning med MATCH Sverige-systemet – ny metodik, utvärdering och resultat för åren 2012-2013, Swedish Meteorological and Hydrological Institute, Norrköping, Sweden, SMHI report nr 2015-7 (in Swedish), 45pp, available at internet URL: <http://www.smhi.se/klimatdata/miljo/atmosfarskemi> (last access March, 2017), 2015.

Amann, M., Derwent, D., Forsberg, B., Hänninen, O., Hurley, F., Krzyzanowski, M., de Leeuw, F., Liu, S.J., Mandin, C., Schneider, J., Schwarze, P. and Simpson, D.: Health risks of ozone from long-range transboundary air pollution. Copenhagen, World Health Organization, Regional office for Europe, 2008. Available at Internet URL: [http://www.euro.who.int/\\_data/assets/pdf\\_file/0005/78647/E91843.pdf](http://www.euro.who.int/_data/assets/pdf_file/0005/78647/E91843.pdf) (last access Aug. 2017)

Formaterat: Engelska (USA)

Formaterat: Engelska (USA)

Andersson, C., Langner, J., and Bergström, R.: Interannual variation and trends in air pollution over Europe due to climate variability during 1958–2001 simulated with a regional CTM coupled to the ERA40 reanalysis, *Tellus B* 59, 77-98, doi: 10.1111/j.1600-0889.2006.00196.x, 2007.

Andersson, C. and Engardt, M.: European ozone in a future climate – the importance of changes in dry deposition and isoprene emissions, *J. Geophys. Res.* 115, doi:10.1029/2008JD011690, 2010.

Andersson, C., Bergström, R., Bennet, C., Robertson, L., Thomas, M., Korhonen, H., Lehtinen, K. E. J., and Kokkola, H.: MATCH-SALSA – Multi-scale Atmospheric Transport and CHemistry model coupled to the SALSA aerosol microphysics model – Part 1: Model description and evaluation, *Geosci. Model Dev.*, 8, 171-189, doi:10.5194/gmd-8-171-2015, 2015.

Bell, M.L., Peng, R.D., Dominici, F.: The exposure-response curve for ozone and risk of mortality and the adequacy of current ozone regulations. *Environ. Health Perspect.*, 114, 532-536, 2006.

1 Carter, W. P.: Condensed atmospheric photooxidation mechanisms for isoprene, Atmos.  
2 Environ. 30, 4275-4290, 1996.

3 Cooper, O. R., Parrish, D. D., Ziemke, J., Cupeiro, M., Galbally, I. E., Gilge, S., Horowitz, L.,  
4 Jensen, N. R., Lamarque, J.-F., Naik, V., Oltmans, S. J., Schwab, J., Shindell, D. T.,  
5 Thompson, A. M., Thouret, V., Wang, Y., and Zbinden, R.M.: Global distribution and trends  
6 of tropospheric ozone: an observation-based review, Elementa: science of the antropocene, 2,  
7 000029, 1-28, doi: 10.12952/journal.elementa.000029, 2014.

8 Courtier, P., Thépaut, J.-N. and Hollingsworth, A.: A strategy for operational implementation  
9 of 4D-Var, using an incremental approach, Q. J. Roy. Meteor. Soc. 120, 1367-1388, 1994.

10 [Dahlgren, P., Landelius, T., Kållberg, P. and Gollvik, S.: A high-resolution regional](#)  
11 [reanalysis for Europe. Part 1: Three-dimensional reanalysis with the regional High-Resolution](#)  
12 [Limited-Area Model \(HIRLAM\). Q.J.R. Meteor. Soc., 142, 2119–2131, doi:10.1002/qj.2807.](#)  
13 [2016.](#)

14 Dee, D. P., Uppala, S., Simmons, A., Berrisford, P., Poli, P., Kobayashi, S., Andrae, U.,  
15 Balmaseda, A., Balsamo, G., Bauer, P., Bechtold, P., Beljaars, A. C. M., van de Berg, L.,  
16 Bidlot, J.-R., Bormann, N., Delsol, C., Dragani, R., Fuentes, M., Geer, A., Haimberger, L.,  
17 Healy, S., Hersbach, H., Hólm, E. V., Isaksen, I., Kållberg, P. W., Köhler, M., Matricardi,  
18 M., McNally, A., Monge-Sanz, B. M., Morcrette, J.-J., Park, B.-K., Peubey, C., De Rosnay,  
19 P., Tavolato, C., Thepaut, J.-J., and Vitart, F.: The ERA-Interim reanalysis: configuration and  
20 performance of the data assimilation system, Quart. J. Roy. Meteor. Soc., 137, 656, 553-597,  
21 2011.

22 Denby, B. and Spangl, W.: The combined use of models and monitoring for applications  
23 related to the European air quality directive: a working sub-group of FAIRMODE,  
24 Proceedings of the HARMO13 conference, Paris, France, June 2010, H13-261, available at  
25 internet URL:  
26 <http://fairmode.jrc.ec.europa.eu/document/fairmode/event/presentation/20100601-h13->  
27 [261.pdf](#) (last access, March, 2017), 2010.

28 Derwent, R. G., Manning, A. J., Simmonds, P. G., and Spain, T. G.: Analysis and  
29 interpretation of 25 years of ozone observations at the Mace Head Atmospheric Research  
30 Station on the Atlantic Ocean coast of Ireland from 1987 to 2012, Atmos. Environ., 80, 361-  
31 368, 2013.

**Borttaget:** Derwent R. G., Simmonds, P. G., Manning, A. J., and Spain, T. G.: Trends over a 20-year period from 1987 to 2007 in surface ozone at the atmospheric research station, Mace Head, Ireland, Atmos. Environ., 41, 9091-9098, 2007.¶

- 1 Derwent, R. G., Utembe, S. R., Jenkin, M. E., and Shallcross, D.E.: Tropospheric ozone
- 2 production regions and the intercontinental origins of surface ozone over Europe, Atmos.
- 3 Environ., 112, 216-224, 2015.
- 4 Engardt, M., Bergström, R., and Andersson, C.: Climate and emissions changes contributing
- 5 to changes in near-surface ozone in Europe over the coming decades – Results from model
- 6 studies, Ambio, 38, 452-458, 2009.
- 7 Engardt, M., Simpson, D., Schwikowski, M. and Granat, L.: Deposition of sulphur and
- 8 nitrogen in Europe 1900-2050. Model calculations and comparison to historical observations,
- 9 Tellus B, 69, 1328945, 2017.
- 10 EU directive 2008/50/EC: directive 2008/50/EC of the European parliament and of the
- 11 council of 21 May 2008 on ambient air quality and cleaner air for Europe, Official Journal of
- 12 the European Union, 44pp, available at internet URL:
- 13 [http://ec.europa.eu/environment/air/quality/legislation/existing\\_leg.htm](http://ec.europa.eu/environment/air/quality/legislation/existing_leg.htm) (last access March,
- 14 2017), 11 June, 2008,
- 15 Finlayson-Pitts, B.J. and Pitts, J.N.: Chemistry of the upper and lower atmosphere. Theory,
- 16 experiments and applications, Academic press, California, USA, 969pp, ISBN: 0-12-257060,
- 17 2000.
- 18 [Fiore, A.M., Dentener, F.J., Wild, O., Cuvelier, C., Schultz, M.G., Hess, P., Textor,](#)
- 19 [C., Schulz, M., Doherty, R.M., Horowitz, L.W., MacKenzie, I.A., Sanderson, M.G., Shindell,](#)
- 20 [D.T., Stevenson, D.S., Szopa, S., Van Dingenen, R., Zeng, G., Atherton, C., Bergmann,](#)
- 21 [D., Bey, I., Carmichael, G., Collins, W.J., Duncan, B.N., Faluvegi, G., Folberth, G., Gauss,](#)
- 22 [M., Gong, S., Hauglustaine, D., Holloway, T., Isaksen, I.S.A., Jacob, D.J., Jonson,](#)
- 23 [J.E., Kaminski, J.W., Keating, T.J., Lupu, A., Marmer, E., Montanaro, V., Park, R.J., Pitari,](#)
- 24 [G., Pringle, K.J., Pyle, J.A., Schroeder, S., Vivanco, M.G., Wind, P., Wojcik, G., Wu, S.](#)
- 25 [and Zuber, A.: Multimodel estimates of intercontinental source-receptor relationships for](#)
- 26 [ozone pollution, J Geophys. Res., 114, D04301, doi: 10.1029/2008JD010816, 2009.](#)
- 27 [Fiore, A.M., Levy II, H. and Jaffe, D.A.: North American isoprene influence on](#)
- 28 [intercontinental ozone pollution, Atmos. Chem. Physics, 11, 1697-1710, 2011.](#)
- 29 [Fusco, A. C. and Logan, J. A.: Analysis of 1970–1995 trends in tropospheric ozone at](#)
- 30 [Northern Hemisphere midlatitudes with the GEOS-CHEM model, J Geophys. Res., 108, D15,](#)
- 31 [4449. doi: 10.1029/2002JD002742, 2003.](#)

Borttaget: submitted to

|                                                                                                                                                              |          |
|--------------------------------------------------------------------------------------------------------------------------------------------------------------|----------|
| Formaterat                                                                                                                                                   | ... [7]  |
| Formaterat: Radavstånd: 1.5 rader, Automatiskt mellanrum mellan asiatiska och latinska tecken, Automatiskt mellanrum mellan asiatiska tecken och siffrercken |          |
| Ändrad fältkod                                                                                                                                               |          |
| Formaterat                                                                                                                                                   | ... [1]  |
| Ändrad fältkod                                                                                                                                               |          |
| Formaterat                                                                                                                                                   | ... [2]  |
| Formaterat                                                                                                                                                   | ... [3]  |
| Formaterat                                                                                                                                                   | ... [4]  |
| Formaterat                                                                                                                                                   | ... [5]  |
| Formaterat                                                                                                                                                   | ... [6]  |
| Ändrad fältkod                                                                                                                                               |          |
| Ändrad fältkod                                                                                                                                               |          |
| Ändrad fältkod                                                                                                                                               |          |
| Ändrad fältkod                                                                                                                                               |          |
| Ändrad fältkod                                                                                                                                               |          |
| Formaterat                                                                                                                                                   | ... [8]  |
| Ändrad fältkod                                                                                                                                               |          |
| Formaterat                                                                                                                                                   | ... [9]  |
| Ändrad fältkod                                                                                                                                               |          |
| Formaterat                                                                                                                                                   | ... [10] |
| Formaterat                                                                                                                                                   | ... [11] |
| Formaterat: Tyska (Tyskland)                                                                                                                                 |          |

1 Gaudel, A., Ancellet, G., and Godin-Beekmann, S.: Analysis of 20 years of tropospheric  
2 ozone vertical profiles by lidar and ECC at Observatoire de Haute Provence (OHP) at 44°N,  
3 6.7°E, Atmos. Environ., 113, 78-89, doi: 10.1016/j.atmosenv.2015.04.028, 2015.

4 Granier, C., Bessagnet, B., Bond, T., D'Angiola, A., Denier van der Gon, H., Frost, G. J.,  
5 Heil, A., Kaiser, J. W., Kinne, S., Klimont, Z., Kloster, S., Lamarque, J.-F., Lioussé, C.,  
6 Masui, T., Meleux, F., Mieville, A., Ohara, T., Raut, J.-C., Riahi, K., Schultz, M. G., Smith,  
7 S. J., Thompson, A., van Aardenne, J., van der Werf, G. R., and van Vuuren D. P.: Evolution  
8 of anthropogenic and biomass burning emissions of air pollutants at global and regional scales  
9 during the 1980–2010 period, Climatic change 109, 163-190, doi: 10.1007/s10584-011-0154-  
10 1, 2011.

11 Hess, P. G. and Zbinden, R.: Stratospheric impact on tropospheric ozone variability and  
12 trends: 1990-2009, Atmos. Chem. Phys., 13, 649-674, doi:10.5194/acp-13-649-2013, 2013.

13 Hjellbrekke, A.-G. and Solberg, S.: Ozone measurements 2013, EMEP/CCC-report 2/2015,  
14 Norwegian institute for Air Research (NILU), Kjeller, Norway, 2015. Available at internet  
15 URL: <http://www.nilu.no/projects/ccc/reports/cccr2-2015.pdf> (last access, Aug. 2017).

16 Inness, A., Baier, F., Benedetti, A., Bouarar, I., Chabrillat, S., Clark, H., Clerbaux, C.,  
17 Coheur, P., Engelen, R. J., Errera, Q., Flemming, J., George, M., Granier, C., Hadji-Lazaro,  
18 J., Huijnen, V., Hurtmans, D., Jones, L., Kaiser, J. W., Kapsomenakis, J., Lefever, K., Leitão,  
19 J., Razinger, M., Richter, A., Schultz, M. G., Simmons, A. J., Suttie, M., Stein, O., Thépaut,  
20 J.-N., Thouret, V., Vrekoussis, M., Zerefos, C., and the MACC team: The MACC reanalysis:  
21 an 8 yr data set of atmospheric composition, Atmos. Chem. Phys., 13, 4073-4109,  
22 doi:10.5194/acp-13-4073-2013, 2013.

23 Jacob, D. J., Logan, J. A., Yevich, R. M., Gardner, G. M., Spivakovsky, C. M., Wofsy, S. C.,  
24 Munger, J. W., Sillman, S., Prather, M. J., Rodgers, M. O., Westberg, H., and Zimmerman, P.  
25 R.: Simulation of summertime ozone over North-America. J. Geophys. Res. 98, D8, 14797-  
26 14816, doi: 10.1029/93JD01223, 1993.

27 Jenkin, M.E.: Trends in ozone concentration distributions in the UK since 1990: local,  
28 regional and global influences, Atmos. Environ. 42, 5434-5445, 2008.

29 Jonson, J. E., Simpson, D., Fagerli, H., and Solberg, S.: Can we explain the trends in  
30 European ozone levels?, Atmos. Chem. Phys., 6, 51-66, doi:10.5194/acp-6-51-2006, 2006.

**Formaterat:** Engelska (USA)

**Formaterat:** Engelska (USA)

**Formaterat:** Hyperlänk, Teckenfärg:  
Svart, Tyska (Tyskland)

**Formaterat:** Tyska (Tyskland)

**Formaterat:** Tyska (Tyskland)

**Ändrad fältkod**

**Borttaget:** IPCC: Climate Change 2013. The physical Science Basis. IPCC Working group I contribution to the AR5, Stocker, T.F., Qin, D., Plattner, G.K., Tignor, M.M.B., Allen, S.K., Boschung, J., Nauels, A., Xia, Y., Bex, V. and Midgley, P.M. (eds.), Cambridge University Press, Cambridge, United Kingdom and New York, NY, USA, 1535pp, available at internet URL: [http://www.climatechange2013.org/images/report/WG1AR5\\_ALL\\_FINAL.pdf](http://www.climatechange2013.org/images/report/WG1AR5_ALL_FINAL.pdf) (last access March, 2017), 2013.¶

1 Kalnay, E.: Atmospheric modeling, data assimilation and predictability. Cambridge  
2 University Press, Cambridge and New York, USA, ISBN 0-521-79629-6, 2003.

3 Karlsson, P. E., Klingberg, J., Engardt, M., Andersson, C., Langner, J., Pihl Karlsson, G., and  
4 Pleijel, H.: Past, present and future concentrations of ground-level ozone and potential  
5 impacts on ecosystems and human health in northern Europe, *Sci. Tot. Environ.*, 576, 22-35,  
6 doi: 10.1016/j.scitotenv.2016.10.061, 2017.

7 Katragkou, E., Zanis, P., Tsikerdekis, A., Kapsomenakis, J., Melas, D., Eskes, H., Flemming,  
8 J., Huijnen, V., Inness, A., Schultz, M. G., Stein, O., and Zerefos, C. S.: Evaluation of near-  
9 surface ozone over Europe from the MACC reanalysis, *Geosci. Model Dev.*, 8, 2299-2314,  
10 doi:10.5194/gmd-8-2299-2015, 2015.

11 Klingberg, J., Björkman, M. P., Pihl Karlsson, G., and Pleijel, H.: Observations of Ground-  
12 level Ozone and NO<sub>2</sub> in Northernmost Sweden, Including the Scandian Mountain Range,  
13 *Ambio*, 38, 448-541, 2009.

14 Klingberg J., Karlsson P. E., Pihl Karlsson G., Hu Y., Chen D., and Pleijel H.: Variation in  
15 ozone exposure in the landscape of southern Sweden with consideration of topography and  
16 coastal climate, *Atmos. Environ.*, 47, 252-260, 2012.

17 Kumar, A., Wu, S., Weise, M. F., Honrath, R., Owen, R. C., Helmig, D., Kramer, L., Val  
18 Martin, M., and Li, Q.: Free-troposphere ozone and carbon monoxide over the North Atlantic  
19 for 2001–2011, *Atmos. Chem. Phys.*, 13, 12537-12547, doi:10.5194/acp-13-12537-2013,  
20 2013.

21 Lacressoniere, G., Foret, G., Beekman, M., Siour, G., Engardt, M., Gauss, M., Watson, L.,  
22 Andersson, C., Colette, A., Josse, B., Macreca, V., Nyirui, A., and Vautard, R.: Impacts of  
23 regional climate change on air quality projections and associated uncertainties, *Climatic*  
24 *change*, 136, 309-324, doi: 10.1007/s10584-016-1619-z, 2016.

25 Lamarque, J.-F., Bond, T. C., Eyring, V., Granier, C., Heil, A., Klimont, Z., Lee, D., Liousse,  
26 C., Mieville, A., Owen, B., Schultz, M. G., Shindell, D., Smith, S. J., Stehfest, E., Van  
27 Aardenne, J., Cooper, O. R., Kainuma, M., Mahowald, N., McConnell, J. R., Naik, V., Riahi,  
28 K., and van Vuuren, D. P.: Historical (1850–2000) gridded anthropogenic and biomass  
29 burning emissions of reactive gases and aerosols: methodology and application, *Atmos.*  
30 *Chem. Phys.*, 10, 7017-7039, doi:10.5194/acp-10-7017-2010, 2010.



1 Langner, J., Bergström, R., and Pleijel, K.: European scale modeling of sulfur, oxidised  
2 nitrogen and photochemical oxidants. Model development and evaluation for the 1994  
3 growing season, Swedish Meteorological and Hydrological Institute, Norrköping, Sweden,  
4 SMHI RMK No. 82, 71 pp. (with errata), available at internet URL:  
5 [http://www.smhi.se/polopoly\\_fs/1.35257!/RMK82.pdf](http://www.smhi.se/polopoly_fs/1.35257!/RMK82.pdf) (last access March, 2017), 1998.

6 [Langner, J., Engardt, M., Baklanov, A., Christensen, J.H., Gauss, M., Geels, C., Hedegaard,](#)  
7 [G.B., Nuterman, R., Simpson, D., Soares, J., \*et al.\* A multi-model study of impacts of climate](#)  
8 [change on surface ozone in Europe. \*Atmos. Chem. Phys.\* 12, 10423–10440, 2012a.](#)

9 Langner, J., Engardt, M., and Andersson, C.: European summer surface ozone 1990–2100,  
10 *Atmos. Chem. Phys.*, 12, 10097–10105, doi:10.5194/acp-12-10097-2012, 2012b.

11 Lefohn, A. S., Malley, C. S., Simon, H., Wells, B., Xu, X., Zhang, L., and Wang, T.:  
12 Responses of human health and vegetation exposure metrics to changes in ozone  
13 concentration distributions in the European Union, United States and China, *Atmos. Environ.*  
14 152, 123–145, doi: 10.1016/j.atmosenv.2016.12.025, 2017.

15 Lelieveld, J. and Dentener, F. J.: What controls tropospheric ozone? *J. Geophys. Res.*, 105,  
16 3531–3551, doi: 10.1029/1999JD901011, 2000.

17 Logan, J. A., Staehelin, J., Megretskaia, I. A., Cammas, J. P., Thouret, V., Claude, H., de  
18 Backer, H., Steinbacher, M., Scheel, H. E., Stübi, R., Fröhlich, M., and Derwent, R.: Changes  
19 in ozone over Europe: Analysis of ozone measurements from sondes, regular aircraft  
20 (MOZAIC) and alpine surface sites, *J. Geophys. Res.* 117, D09301,  
21 doi:10.1029/2011JD016952, 2012.

22 Markakis, K., Valari, M., Engardt, M., Lacressonniere, G., Vautard, R., and Andersson, C.:  
23 Mid-21st century air quality at the urban scale under the influence of changed climate and  
24 emissions – case studies for Paris and Stockholm, *Atmos. Chem. Phys.*, 16, 1877–1894,  
25 doi:10.5194/acp-16-1877-2016, 2016.

26 Miyazaki, K., Eskes, H. J., and Sudo, K.: A tropospheric chemistry reanalysis for the years  
27 2005–2012 based on an assimilation of OMI, MLS, TES, and MOPITT satellite data, *Atmos.*  
28 *Chem. Phys.*, 15, 8315–8348, doi:10.5194/acp-15-8315-2015, 2015.

29 Monks, P.S., Archibald, A.T., Colette, A., Cooper, O., Coyle, M., Derwent, R., Fowler, D.,  
30 Granier, C., Law, K.S., Mills, G.E., Stevenson, D.S., Tarasova, O., Thouret, V., von  
31 Schneidmesser, E., Sommariva, R., Wild, O., and Williams, M.L.: Tropospheric ozone and

**Formaterat:** Teckensnitt:(Standard)  
Times New Roman, Teckenfärg: Svart,  
Engelska (USA)

**Formaterat:** Teckensnitt:(Standard)  
Times New Roman, Teckenfärg: Svart,  
Engelska (USA)

**Formaterat:** Teckenfärg: Svart,  
Engelska (USA)

**Formaterat:** Engelska (USA)

**Formaterat:** Teckensnitt: Inte Fet,  
Engelska (USA)

**Formaterat:** Engelska (USA)

1 its precursors from the urban to the global scale from air quality to short-lived climate forcer,  
 2 Atmos. Chem. Phys. 15, 8889-8973, doi:10.5194/acp-15-8889-2015, 2015.

3 NV: Internet URL: [http://www.naturvardsverket.se/en/Environmental-objectives-and-](http://www.naturvardsverket.se/en/Environmental-objectives-and-cooperation/Swedens-environmental-objectives/The-national-environmental-objectives/Clean-Air/Specifications-for-Clean-Air/)  
 4 [cooperation/Swedens-environmental-objectives/The-national-environmental-](http://www.naturvardsverket.se/en/Environmental-objectives-and-cooperation/Swedens-environmental-objectives/The-national-environmental-objectives/Clean-Air/Specifications-for-Clean-Air/)  
 5 [objectives/Clean-Air/Specifications-for-Clean-Air/](http://www.naturvardsverket.se/en/Environmental-objectives-and-cooperation/Swedens-environmental-objectives/The-national-environmental-objectives/Clean-Air/Specifications-for-Clean-Air/) Last access, 21 March, 2017.

6 Ohara, T., Akimoto, H., Kurokawa, J., Horii, N., Yamaji, K., Yan, X., and Hayasaka, T.: An  
 7 Asian emission inventory of anthropogenic emission sources for the period 1980–2020,  
 8 Atmos. Chem. Phys., 7, 4419-4444, doi:10.5194/acp-7-4419-2007, 2007.

9 Oltmans, S.J., Lefohn, A.S., Harris, J.M., Galbally, I., Scheel, H.E., Bodeker, G., Brunke, E.,  
 10 Claude, H., Tarasick, D., Johnson, B.J., Simmonds, P., Shadwick, D., Anlauf, K., Hayden, K.,  
 11 Schmidlin, F., Fujimoto, T., Akagi, K., Meyer, C., Nichol, S., Davies, J., Redondas, A. and  
 12 Cuevaso, E.: Long-term changes in tropospheric ozone, Atmos. Environ., 40, 3156-3173,  
 13 2006.

14 Parrish, D. D., Law, K. S., Staehelin, J., Derwent, R., Cooper, O. R., Tanimoto, H., Volz-  
 15 Thomas, A., Gilge, S., Scheel, H.-E., Steinbacher, M., and Chan, E.: Long-term changes in  
 16 lower tropospheric baseline ozone concentrations at northern mid-latitudes, Atmos. Chem.  
 17 Phys., 12, 11485-11504, doi:10.5194/acp-12-11485-2012, 2012.

18 Parrish, D.D., Law, K.S., Staehelin, J., Derwent, R., Cooper, O.R., Tanimoto, H., Volz-  
 19 Thomas, A., Gilge, S., Scheel, H.-E., Steinbacher, M. and Chan, E.: Lower tropospheric  
 20 ozone at northern midlatitudes: changing seasonal cycle, Geophys. Res. Lett., 40, 1631-1636,  
 21 doi: 10.1002/grl.50303, 2013.

22 Parrish, D. D., Lamarque, J.-F., Naik, V., Horowitz, L., Shindell, D. T., Staehelin, J.,  
 23 Derwent, R., Cooper, O. R., Tanimoto, H., Volz-Thomas, A., Gilge, S., Scheel, H.-E.,  
 24 Steinbacher, M. and Fröhlich, M.: Long-term changes in lower tropospheric baseline ozone  
 25 concentrations: Comparing chemistry-climate models and observations at northern  
 26 midlatitudes, J Geophys. Res. Atmos., 119, 5719–5736, doi:10.1002/2013JD021435, 2014.

27 Pozzoli, L., Janssen-Maenhout, G., Diehl, T., Bey, I. Schultz, M. G., Feichter, J., Vignati, E.  
 28 and Dentener F.: Re-analysis of tropospheric sulfate aerosol and ozone for the period 1980–  
 29 2005 using the aerosol-chemistry-climate model ECHAM5-HAMMOZ, Atmos. Chem. Phys.,  
 30 11, 9563-9594, doi: 10.5194/acp-11-9563-2011, 2011.

Borttaget: ed

1 Robertson, L., Langner, J. and Engardt, M.: An Eulerian limited-area atmospheric transport  
2 model, *J. Appl. Meteor.*, 38, 190-210, 1999.

3 Robertson, L. and Kahnert, M.: 2D variational data assimilation of near surface chemical  
4 species, Borrego, C. and Renner, E. (eds), *Air pollution modelling and its application XVIII*,  
5 Elsevier, Amsterdam, 2007.

6 Robichaud, A. and Ménard, R.: Multi-year objective analyses of warm season ground-level  
7 ozone. *Atmos. Chem. Phys.*, 14, 1769-1800, 2014.

8 Royal Society: Ground level ozone in the 21<sup>st</sup> century: future trends, impacts and policy  
9 implications, Science Policy report 15/08, the royal society, London, UK, available online at  
10 internet URL:  
11 [https://royalsociety.org/~media/Royal\\_Society\\_Content/policy/publications/2008/7925.pdf](https://royalsociety.org/~media/Royal_Society_Content/policy/publications/2008/7925.pdf)  
12 (last access March, 2017), 2008.

13 Schultz, M.G., Backman, L., Balkanski, Y., Bjoernsdalsaeter, S., Brand, R., Burrows, J.P.,  
14 Dalsoeren, S., de Vasconcelos, M., Grodtmann, B., Hauglustaine, D.A., Heil, A.,  
15 Hoelzemann, J.J., Isaksen, I.S.A., Kaurola, J., Knorr, W., Ladstaetter-Weissenmayer, A.,  
16 Mota, B., Oom, D., Pacyna, J., Panasiuk, D., Pereira, J.M.C., Pulles, T., Pyle, J., Rast, S.,  
17 Richter, A., Savage, N., Schnadt, C., Schulz, M., Spessa, A., Stachelin, J., Sundet, J.K.,  
18 Szopa, S., Thonicke, K., van het Bolscher, M., van Noije, T., van Velthoven, P., Vik, A.F. and  
19 Wittrock, F.: Reanalysis of the Tropospheric chemical composition over the past 40 years  
20 (RETRO) – a long-term global modeling study of tropospheric chemistry, Final report,  
21 Schultz, M.G. (ed.), Reports on Earth System Science, 48/2007, Max Planck Institute for  
22 Meteorology, Hamburg, Germany, available at internet URL:  
23 [https://www.mpimet.mpg.de/fileadmin/publikationen/Reports/WEB\\_BzE\\_48.pdf](https://www.mpimet.mpg.de/fileadmin/publikationen/Reports/WEB_BzE_48.pdf) (last access:  
24 March 2017), 2007.

25 Simon, H., Reff, A., Wells, B., Xing, J. and Frank, N.: Ozone trends across the United States  
26 over a period of decreasing NOx and VOC emissions, *Environ. Sci. Technol.*, 49, 186-195.  
27 doi: 10.1021/es504514z, 2015..

28 Simpson, D., Guenther, A., Hewitt, C.N. and Steinbrecher, R.: Biogenic emissions in Europe:  
29 1. Estimates and uncertainties, *J. Geophys. Res. Atmos.*, 100, D11, 22875-22890, 1995.

30 Simpson, D., Benedictow, A., Berge, H., Bergström, R., Emberson, L. D., Fagerli, H.,  
31 Flechard, C. R., Hayman, G. D., Gauss, M., Jonson, J. E., Jenkin, M. E., Nyíri, A., Richter,

**Borttaget:** Simmonds, P.G., Derwent,  
R.G., Manning, A.L. and Spain, G.:  
Significant growth in surface ozone at Mace  
Head, Ireland, 1987-2003, *Atmos. Environ.*,  
38, 4769-4778, 2004.¶

1 C., Semeena, V. S., Tsyro, S., Tuovinen, J.-P., Valdebenito, Á., and Wind, P.: The EMEP  
2 MSC-W chemical transport model – technical description, *Atmos. Chem. Phys.*, 12, 7825-  
3 7865, doi:10.5194/acp-12-7825-2012, 2012.

4 Simpson, D., Arneth, A., Mills, G., Solberg, S. and Uddling, J.: Ozone – the persistent  
5 menace: interactions with the N cycle and climate change, *Current opinion in Environ.*  
6 *Sustainability*, 9, 9-19, 2014.

7 Stocker, T.F., Qin, D., Plattner, G.-K., Alexander, L.V., Allen, S.K., Bindoff, N.L., Bréon, F.-  
8 M., Church, J.A., Cubasch, U., Emori, S., Forster, P., Friedlingstein, P., Gillett, N. Gregory,  
9 J.M., Hartmann, D.L., Jansen, E., Kirtman, B., Knutti, R., Krishna Kumar, K., Lemke, P.,  
10 Marotzke, J., Masson-Delmotte, V., Meehl, G.A., Mokhov, I.I., Piao, S., Ramaswamy, V.  
11 Randall, D., Rhein, M., Rojas, M., Sabine, C., Shindell, D., Talley, L.D., Vaughan, D.G. and  
12 Xie, S.-P.: Technical Summary. In: Climate Change 2013: The Physical Science Basis.  
13 Contribution of Working Group I to the Fifth Assessment Report of the Intergovernmental  
14 Panel on Climate Change [Stocker, T.F., D. Qin, G.-K. Plattner, M. Tignor, S.K. Allen, J.  
15 Boschung, A. Nauels, Y. Xia, V. Bex and P.M. Midgley (eds.)]. Cambridge University Press,  
16 Cambridge, United Kingdom and New York, NY, USA, 2013.

17 Verstraeten, W.W., Neu, J.L., Williams, J.E., Bowman, K.W., Worden, J.R. and Folkert  
18 Boersma, K.: Rapid increases in tropospheric ozone production and export from China.  
19 *Nature geoscience* 8, 690-697, 2015.

20 Watson, L., Lacressoniere, G., Gauss, M., Engardt, M., Andersson, C., Josse, B., Marecal, V.,  
21 Nyiri, A., Sobolowski, S., Siour, G. and Vautard, R.: The impact of meteorological forcings  
22 on gas phase air pollutants over Europe. *Atmos. Environ.* 119, 240-257, 2015.

23 Watson, L., Lacressonnire, G., Gauss, M., Engardt, M., Andersson, C., Josse, B., Marcal, V.,  
24 Nyiri, A., Sobolowski, S., Szopa, S., Siour, G. and Vautard, R.: Impact of emissions and +2°C  
25 climate change upon future ozone and nitrogen dioxide over Europe, *Atmos. Environ.*, 142,  
26 271-285, doi:10.1016/j.atmosenc.2016.07.051, 2016.

27 WHO: WHO Air quality guidelines for particulate matter, ozone, nitrogen dioxide and sulfur  
28 dioxide. Global update 2005. Summary of risk assessment, WHO press, World Health  
29 Organization, Geneva, Switzerland, available online at internet URL  
30 [http://www.who.int/phe/health\\_topics/outdoorair/outdoorair\\_aqg/en/](http://www.who.int/phe/health_topics/outdoorair/outdoorair_aqg/en/) (last access March,  
31 2017), 2006.

1 Xing, J., Mathur, R., Pleim, J., Hogrefe, C., Gan, C.-M., Wong, D.C., Wei, C., Gilliam, R.  
2 and Pouliot, G.: Observations and modeling of air quality trends over 1990-2010 across the  
3 northern hemisphere: China, the United States and Europe., *Atmos. Chem. Phys.*, 15, 2723-  
4 2747, doi:10.5194/acp-15-2723-2015, 2015.

5 Zanis, P., Hadjinicolaou, P., Pozzer, A., Tyrllis, E., Dafka, S., Mihalopoulos, N. and Lelieveld,  
6 J.: Summertime free-tropospheric ozone pool over the eastern Mediterranean/Middle East,  
7 *Atmos. Chem. Phys.*, 14, 115-132. doi: 10.5194/acp-14-115-2014, 2014..

8 Zhang, Y. Bocquet, M., Mallet, V., Seigneur, C. and Baklanov, A.: Real-time air quality  
9 forecasting, part II: State of the science, current research needs, and future prospects, *Atmos.*  
10 *Environ.*, 60, 656-676, doi: 10.1016/j.atmosenv.2012.02.041, 2012.

11

12

## Figure and table legends

### Figure legends

Figure 1. a) A flow-chart of the relevant part of the MATCH Sweden system for this reanalysis study.

Figure 2. (a) Temporal trend of factors used for scaling boundary concentration of relevant species (based on Engardt et al., 2017). (b) Temporal trend of total domain (circles; left vertical scale) and Swedish (triangles; right vertical scale) annual anthropogenic O<sub>3</sub> precursor emissions utilized by MATCH from 1990 to 2013. Emissions of nitrogen oxides (NO<sub>x</sub>), non-methane volatile organic compounds (NMVOC) and carbon monoxide (CO) are indicated by different colors (cf. legend); emissions of sulfur oxides (SO<sub>x</sub>) and ammonia (NH<sub>3</sub>) are excluded from the panel.

Figure 3. Instrumentation sites for hourly near-surface ozone concentration observations in Sweden and Norway, which are used in the variational analysis. Red circles: sites with full data coverage. Blue circles: sites with restricted data coverage. The subdivision of Sweden into three regions (North, Central and South) follows county borders, as indicated by the fat black lines.

Figure 4. Data availability at instrumentation sites for hourly near-surface ozone concentration observations in Sweden and Norway. Red squares: years with at least 80 % annual data for sites with full data coverage (see also Fig. 3). Light red: sites with <80 % annual data (data capture indicated in square) for sites with full coverage. Blue and light blue squares: as for the red squares, but for sites with restricted data coverage.

Figure 5. (a,b) Temporal trends in annual percentiles of hourly mean near-surface ozone (levels: 0, 2, 5, 10, 25, 50, 75, 90, 95, 98 and 100, cf. also Table S2) averaged for the three regions North (blue), Central (green) and South (magenta) for the sum of the contributions to the trend (SUM) vs the MATCH model simulation MFG (a) and the reanalysis LONGTERM vs the MATCH model simulation MFG (b). Filled circles indicate significant trends ( $p \leq 0.05$ ) in the MFG simulation, whereas non-significant MFG trends ( $p > 0.05$ ) are indicated by an empty circle. (c) Sensitivity in contributions to the secular trends in regionally (North: squares, Central: circles, South: diamonds) averaged annual percentiles (levels: 0, 2, 5, 10, 25, 50, 75, 90, 95, 98 and 100) of hourly near-surface O<sub>3</sub> over the period 1990-2013 due to choice of base year (1990 vs 2011). Modelled contributions to the near-surface ozone trend due to

Formaterat: Inte Färgöverstrykning

change in top and lateral boundaries of relevant species (dark yellow, bound), change in full domain emissions (blue, SE emis + FD emis), and variation in meteorology (fair yellow, meteo). 1:1 line in black, factor 2 lines in dark grey.

Figure 6. Seasonal cycle of monthly mean (a) and monthly maximum (b) of 1h mean near-surface ozone concentrations averaged over the period 1990-2013 (circles; left vertical scale) and region (North, Central and South Sweden, cf. Fig. 3) and the linear trend over the same period of the respective spatially averaged monthly values (triangles; right vertical scale). The different regions are identified by the colors, see legend. Results from the LONGTERM reanalysis.

Figure 7. Statistical properties of the annual mean (top row; (a)-(e)) and annual maximum 1h mean (bottom row; ((f)-(j))) near-surface ozone concentration. In the columns from left to right: 1990-2013 mean ((a),(f)), 1990-2013 maximum ((b),(g)), 1990-2013 standard deviation ((c),(h)), linear trend over the period 1990-2013 ((d),(i)) and significance in the linear trend over the period ((e),(j)). Results from the LONGTERM reanalysis.

Figure 8. Temporal variation of annual percentiles of near-surface ozone concentrations averaged over the three regions North (a), Central (b) and South (c) of Sweden (cf. Fig. 3). The line marked 0 is the zero-percentiles (lowest hourly mean near-surface ozone concentration of the year), 100 is 100-percentile (highest hourly mean near-surface ozone concentration of the year), 50 is the 50-percentile (i.e. annual median of the hourly mean near-surface ozone concentration). The sign of the corresponding linear trend (cf. Supplements Table S2, including a statistical analysis of the trend) of each percentile is indicated by colour: a negative linear trend over 1990-2013 is indicated by grey symbols; a positive trend by orange symbols. Statistically significant trends ( $p \leq 0.05$ ) are indicated by thick lines. Results from the LONGTERM reanalysis.

Figure 9. Linear trend over 1990-2013 in monthly mean ((a),(c)) and monthly maximum 1 hour mean ((b),(d)) near-surface ozone concentration for the North ((a),(b)) and the South ((c),(d)) Swedish regions (cf. Fig. 3). Reanalyzed (white diamond; LONGTERM reanalysis) and modelled “first guess” (MFG) near-surface ozone trend (brown diamond), and modelled contributions to the near-surface ozone trend due to change in emissions: anthropogenic Swedish (dark blue, SE emis) and full domain, non-Swedish (fair blue, FD emis), emissions, trend in top and lateral boundaries of relevant species (dark yellow, bound) and variation in

meteorology (fair yellow, meteo). The sum of the modelled contributions is indicated by the dashed brown line.

Figure 10. Linear trends over 1990-2013 in annual percentiles of hourly mean near-surface ozone concentrations for the North (a) and the South (b) Sweden regions. Reanalyzed (white diamond; LONGTERM reanalysis) and modelled MFG near-surface ozone trend (brown diamond), and modelled contributions to the near-surface ozone concentration trend due to change in emissions: anthropogenic Swedish (dark blue, SE emis) and full domain, non-Swedish (fair blue, FD emis), emissions, trend in top and lateral boundaries of relevant species (dark yellow, bound) and variation in meteorology (fair yellow, meteo). The sum of the modelled contributions is indicated by the dashed brown line.



## 1    **Table legends**

2    Table 1a. Model calculations and scenarios, all covering the years 1990-2013, including the  
3    “first guess” to the [retrospective variational data analysis](#) and base case to the sensitivity  
4    simulations (MFG), two reanalysis data sets (LONGTERM and ALL), sensitivity scenarios  
5    ([MFD](#), MSE, MBC and MMET).

6    Table 1b. Formation of contributions to the linear trend over the period 1990-2013 from the  
7    sensitivity simulations (Se emis, Eur emis, Bound and Meteo, see Table 1a).

8    Table 2. Evaluation of modelled hourly [and daily maximum of 1h mean](#) near-surface ozone  
9    concentrations in 2013 at Swedish observation sites. Mean value (mean), standard deviation  
10    ( $\sigma$ ), model mean bias normalized by the observed mean (%bias), Pearson correlation  
11    coefficients (r) for data including at least 10 pairs, the root mean square error (RMSE) and  
12    number of observed hours/[days](#) at the sites. The evaluation includes the reanalyzed data sets  
13    ALL and LONGTERM, where ALL is evaluated at the 12 Swedish sites included in that  
14    simulation, and LONGTERM is evaluated at the 6 Swedish sites included in that simulation  
15    (cf. Fig. 4). For each of these data set evaluations we include the observation *dependent*  
16    reanalysis (2dvar), the observation *independent* cross validation of the reanalysis (cross) and  
17    the MATCH base case simulation (MFG). The top half of the table shows the temporal  
18    performance (spatial mean of [evaluation](#) statistics, see Supplement Sect. S1). The bottom half  
19    of the table shows spatial performance (spatial statistics of annual means, see Supplement  
20    Sect. S1).

21    Table 3. Linear trend during 1990-2013 of policy related metrics in the 3 Swedish regions  
22    North, Central and South (cf. Fig. 3). Stars (\*, \*\*, and \*\*\*) indicate that the trend is  
23    significant ( $p \leq 0.05$ ,  $p \leq 0.01$ ,  $p \leq 0.001$ , respectively).

24

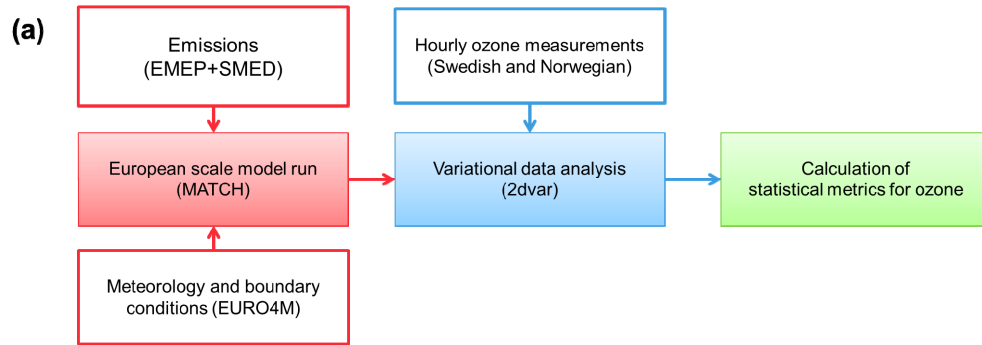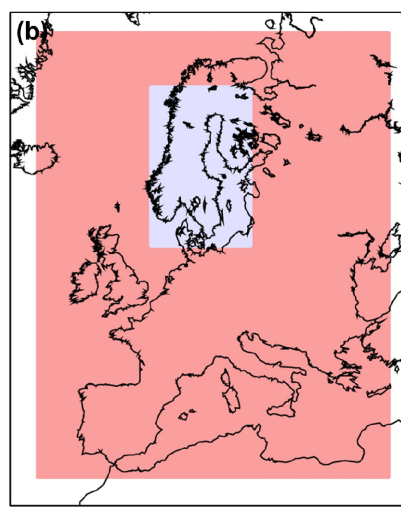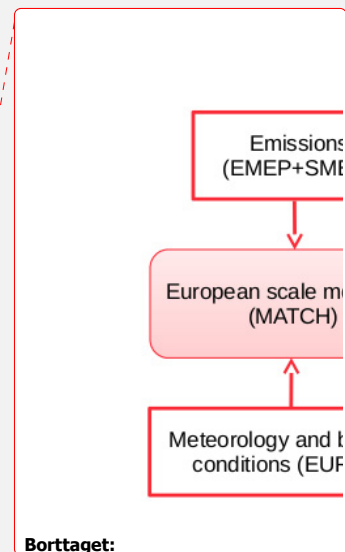

Figure 1. a) A flow-chart of the relevant part of the MATCH Sweden system for this reanalysis study. b) The total domain of the European scale model run (pink + light blue) and the domain of the variational data analysis (light blue).

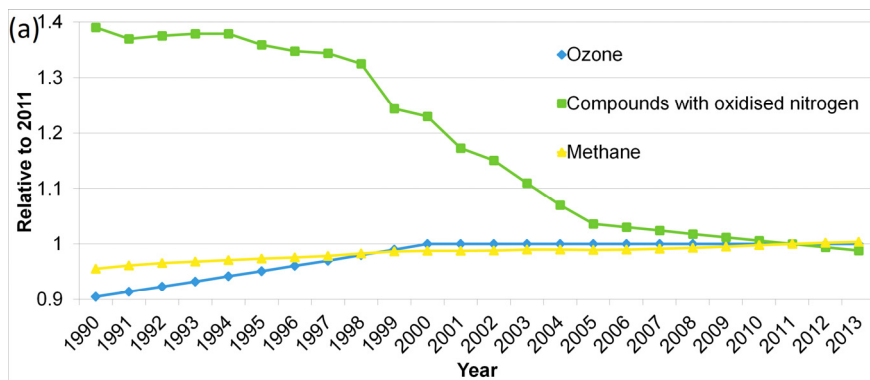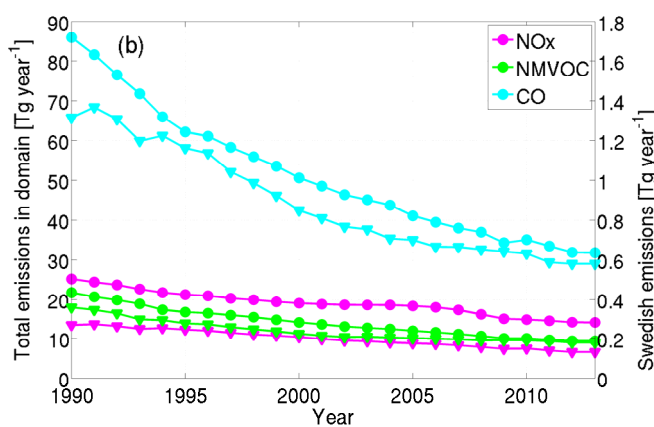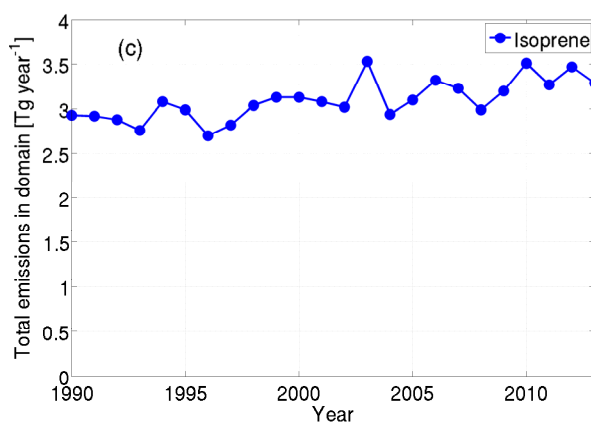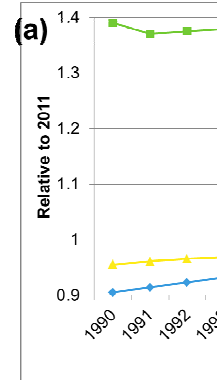

Borttaget:

(b)

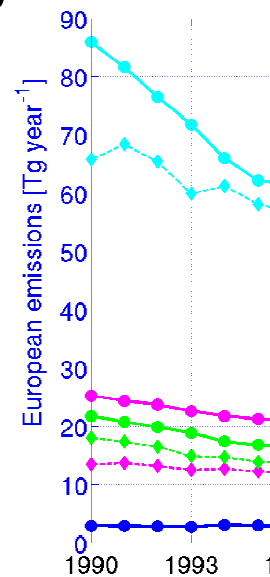

Borttaget: Secular

Borttaget: Note that the hemispheric background ozone concentrations are assumed constant from 2000 onwards. CO and NMVOC boundaries are held constant throughout the simulation.

Borttaget: solid lines

Borttaget: dashed lines

Formaterat: Inte Färgöverstrykning

Figure 2. (a) Temporal trend of factors used for scaling boundary concentration of relevant species (based on Engardt et al., 2017). (b) Temporal trend of total domain (circles; left vertical scale) and Swedish (triangles; right vertical scale) annual anthropogenic  $O_3$  precursor emissions utilized by MATCH from 1990 to 2013. Emissions of nitrogen oxides ( $NO_x$ ), non-

1 | methane volatile organic compounds (NMVOC) and carbon monoxide (CO) are indicated by  
2 | different colors (cf. legend); emissions of sulfur oxides (SO<sub>x</sub>) and ammonia (NH<sub>3</sub>) are  
3 | excluded from the panel. (c) Temporal trend of total domain biogenic isoprene emissions.  
4 |

**Borttaget:** ,

**Borttaget:** and biogenic isoprene (C<sub>5</sub>H<sub>8</sub>)

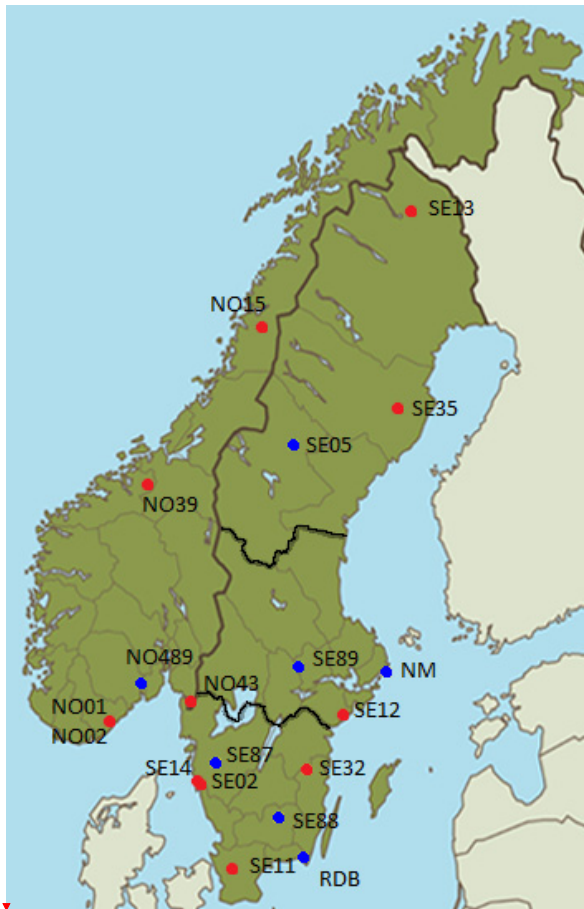

Borttaget: ¶

Figure 3. Instrumentation sites for hourly near-surface ozone concentration observations in Sweden and Norway, which are used in the variational analysis. Red circles: sites with full data coverage. Blue circles: sites with restricted data coverage. The subdivision of Sweden into three regions (North, Central and South) follows county borders, as indicated by the fat black lines.

|       |                 | 1990 | 1991 | 1992 | 1993 | 1994 | 1995 | 1996 | 1997 | 1998 | 1999 | 2000 | 2001 | 2002 | 2003 | 2004 | 2005 | 2006 | 2007 | 2008 | 2009 | 2010 | 2011 | 2012 | 2013 |
|-------|-----------------|------|------|------|------|------|------|------|------|------|------|------|------|------|------|------|------|------|------|------|------|------|------|------|------|
| SE13  | Esrange         | 30   |      |      |      |      |      |      |      |      |      |      |      |      |      |      |      |      |      |      |      |      |      |      |      |
| SE35  | Vindeln         |      |      |      |      |      |      |      |      |      |      |      |      |      |      |      |      |      |      |      |      |      |      |      |      |
| SE05  | Bredkälen       |      |      |      |      |      |      |      |      |      |      |      |      |      |      | 58   |      |      |      |      |      |      |      |      |      |
| SE89  | Grimsö          |      |      |      |      |      |      |      |      |      |      | 42   |      |      |      |      |      |      |      |      |      |      |      |      |      |
| NM    | Norr Malma      |      |      |      |      |      |      |      |      |      |      |      |      |      |      |      | 0.01 |      |      |      |      |      |      |      |      |
| SE12  | Aspvreten       |      |      |      |      |      |      |      |      |      |      |      |      |      |      |      |      |      |      |      |      |      |      |      |      |
| SE32  | Norra Kvill     |      |      |      |      |      |      |      |      |      |      |      |      |      |      |      |      |      |      |      |      |      |      |      |      |
| SE88  | Asa försökspark |      |      |      |      |      | 50   |      |      |      | 75   |      |      |      |      | 45   |      |      |      |      |      |      |      | 58   |      |
| SE87  | Östad           |      |      |      |      |      |      |      |      |      |      |      | 47   | 34   | 20   | 45   | 49   | 50   | 50   | 50   | 50   | 50   | 49   | 50   |      |
| SE02  | Rörvik          |      |      |      |      |      |      |      |      |      |      |      |      |      |      |      |      |      |      |      |      |      |      |      |      |
| SE14  | Råö             |      |      |      |      |      |      |      |      |      |      |      |      |      |      |      |      |      |      |      |      |      |      |      |      |
| RDB   | Rödeby          |      |      |      |      |      |      |      |      |      |      |      |      |      |      |      |      |      |      |      |      |      |      |      | 56   |
| SE11  | Vavihill        |      |      |      |      |      |      |      |      |      |      |      |      |      |      |      |      |      |      |      |      |      |      |      |      |
| NO15  | Tustervatn      |      |      |      | 73   |      |      |      |      |      |      |      |      |      |      |      |      |      |      |      |      |      |      |      |      |
| NO39  | Kårvatn         |      |      |      |      |      |      |      |      |      |      |      |      |      |      |      |      |      |      |      |      |      |      |      |      |
| NO489 | Haukenes        |      | 47   | 22   | 42   | 51   | 51   | 53   | 55   | 49   | 49   | 51   | 39   | 53   | 53   |      |      | 40   |      | 67   |      |      | 72   |      |      |
| NO43  | Prestebakke     |      |      | 65   |      |      |      |      |      |      |      |      |      |      |      |      |      |      |      |      |      |      |      |      |      |
| NO01  | Birkenes I      |      |      |      |      |      |      |      |      |      |      |      |      |      |      |      |      |      |      |      |      |      |      |      |      |
| NO02  | Birkenes II     |      |      |      |      |      |      |      |      |      |      |      |      |      |      |      |      |      |      |      |      |      |      |      | 79   |

Figure 4. Data availability at instrumentation sites for hourly near-surface ozone concentration observations in Sweden and Norway. Red squares: years with at least 80 % annual data for sites with full data coverage (see also Fig. 3). Light red: sites with <80 % annual data (data capture indicated in square) for sites with full coverage. Blue and light blue squares: as for the red squares, but for sites with restricted data coverage. White squares: no observations are available for that year and site. The LONGTERM reanalysis includes the red measurement sites, the ALL reanalysis includes both red and blue.

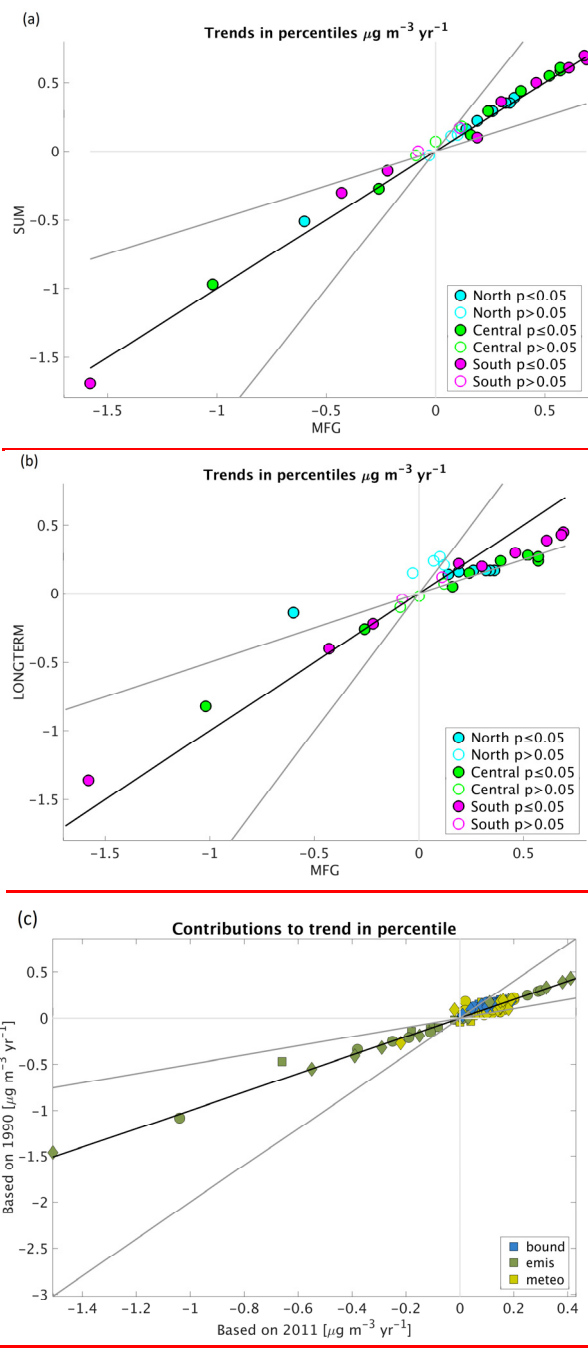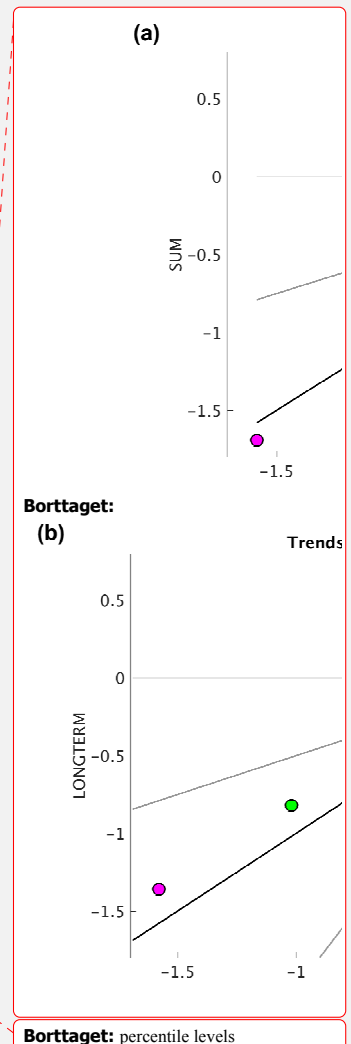

Figure 5. (a,b) Temporal trends in annual percentiles of hourly mean near-surface ozone (levels: 0, 2, 5, 10, 25, 50, 75, 90, 95, 98 and 100, cf. also Table S2) averaged for the three regions North (blue), Central (green) and South (magenta) for the sum of the contributions to

1 the trend (SUM) vs the MATCH model simulation MFG (a) and the [reanalysis LONGTERM](#)  
2 [vs the](#) MATCH model simulation MFG (b). Filled circles indicate significant trends ( $p \leq 0.05$ )  
3 in the MFG simulation, whereas non-significant MFG trends ( $p > 0.05$ ) are indicated by an  
4 empty circle. (c) Sensitivity in contributions to the secular trends in regionally (North:  
5 squares, Central: circles, South: diamonds) averaged annual percentiles (levels: 0, 2, 5, 10, 25,  
6 50, 75, 90, 95, 98 and 100) of hourly near-surface  $O_3$  over the period 1990-2013 due to choice  
7 of base year (1990 vs 2011). Modelled contributions to the near-surface ozone trend due to  
8 change in top and lateral boundaries of relevant species (dark yellow, bound), change in full  
9 domain emissions (blue, SE emis + FD emis), and variation in meteorology (fair yellow,  
10 meteo). 1:1 line in black, factor 2 lines in dark grey.

**Borttaget:** vs the reanalysis  
LONGTERM

**Borttaget:**

**Borttaget:** and equal sign quadrants are  
separated by light grey lines.¶



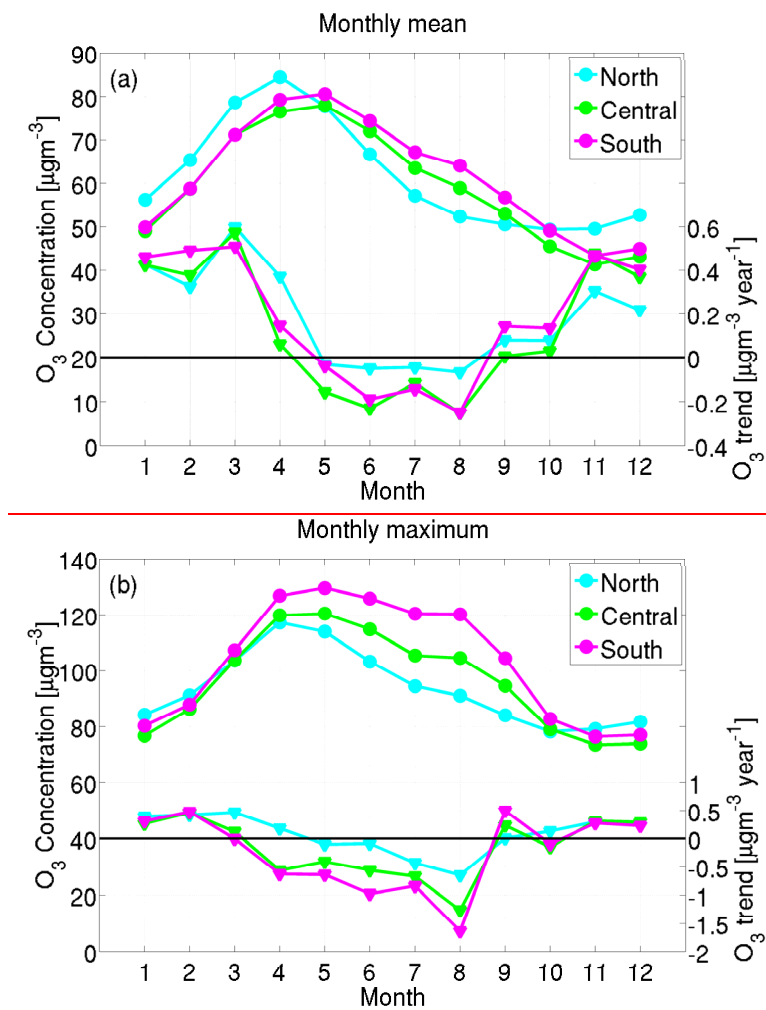

Figure 6. Seasonal cycle of monthly mean (a) and monthly maximum (b) of 1h mean near-surface ozone concentrations averaged over the period 1990-2013 (circles; left vertical scale) and region (North, Central and South Sweden, cf. Fig. 3) and the linear trend over the same period of the respective spatially averaged monthly values (triangles; right vertical scale). The different regions are identified by the colors, see legend. Results from the LONGTERM reanalysis.

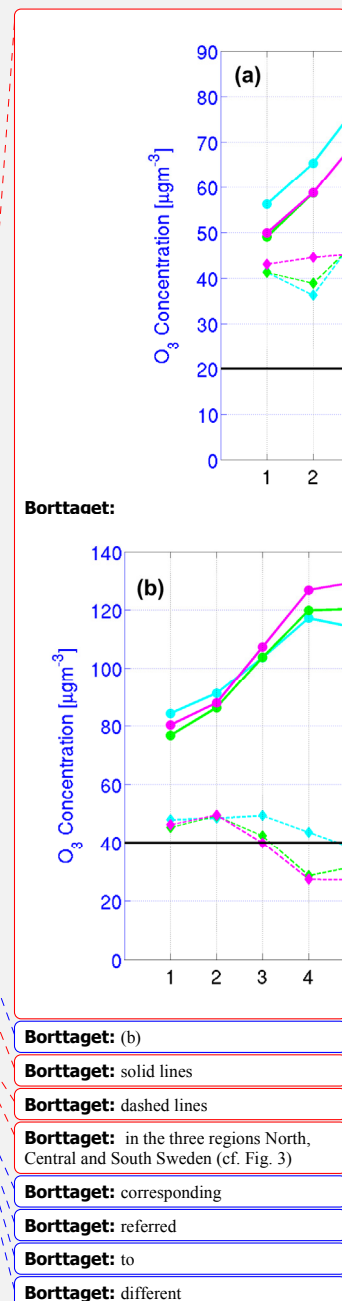

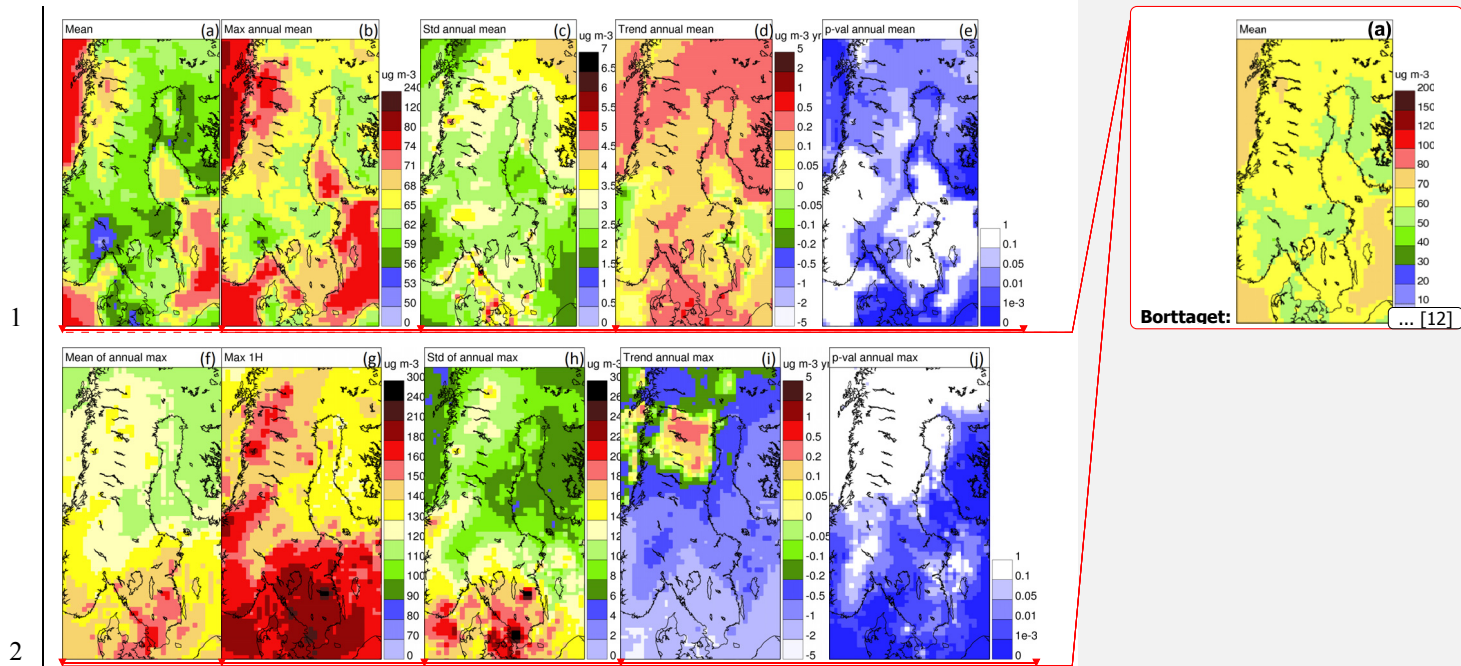

Figure 7. Statistical properties of the annual mean (top row; (a)-(e)) and annual maximum 1h mean (bottom row; ((f)-(j))) near-surface ozone concentration. In the columns from left to right: 1990-2013 mean ((a),(f)), 1990-2013 maximum ((b),(g)), 1990-2013 standard deviation ((c),(h)), linear trend over the period 1990-2013 ((d),(i)) and significance in the linear trend over the period ((e),(j)). Results from the LONGTERM reanalysis.

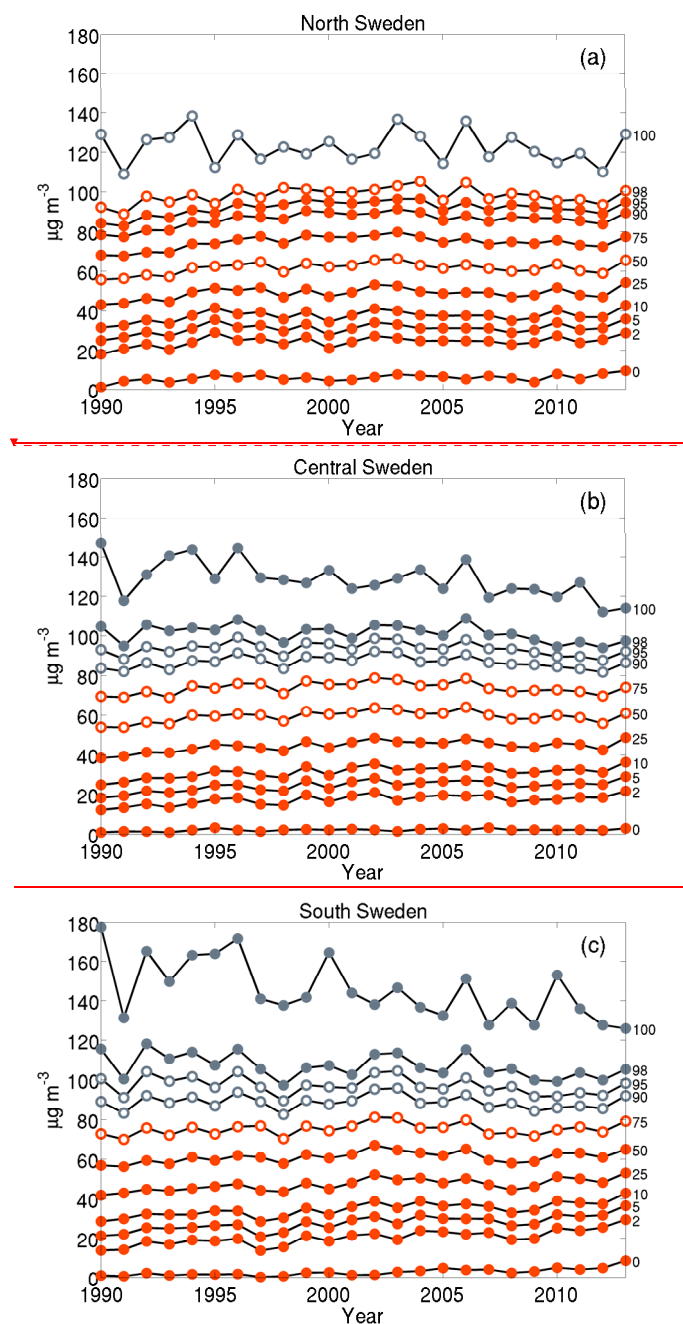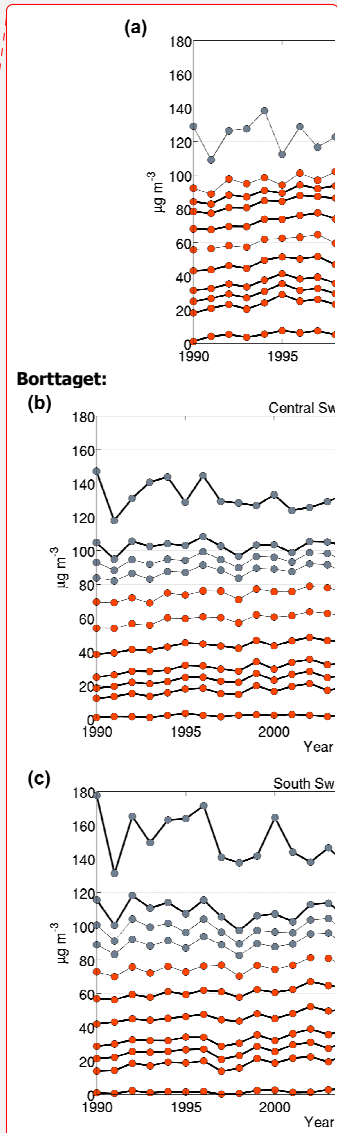

Figure 8. Temporal variation of annual percentiles of near-surface ozone concentrations averaged over the three regions North (a), Central (b) and South (c) of Sweden (cf. Fig. 3). The line marked 0 is the zero-percentiles (lowest hourly mean near-surface ozone

1 concentration of the year), 100 is 100-percentile (highest hourly mean near-surface ozone  
2 concentration of the year), 50 is the 50-percentile (i.e. annual median of the hourly mean near-  
3 surface ozone concentration). The sign of the corresponding linear trend (cf. Supplements  
4 | Table S2, including a statistical analysis of the trend) of each percentile is indicated by colour:  
5 a negative linear trend over 1990-2013 is indicated by grey symbols; a positive trend by  
6 orange symbols. Statistically significant trends ( $p \leq 0.05$ ) are indicated by thick lines. Results  
7 from the LONGTERM reanalysis.

Borttaget: 3

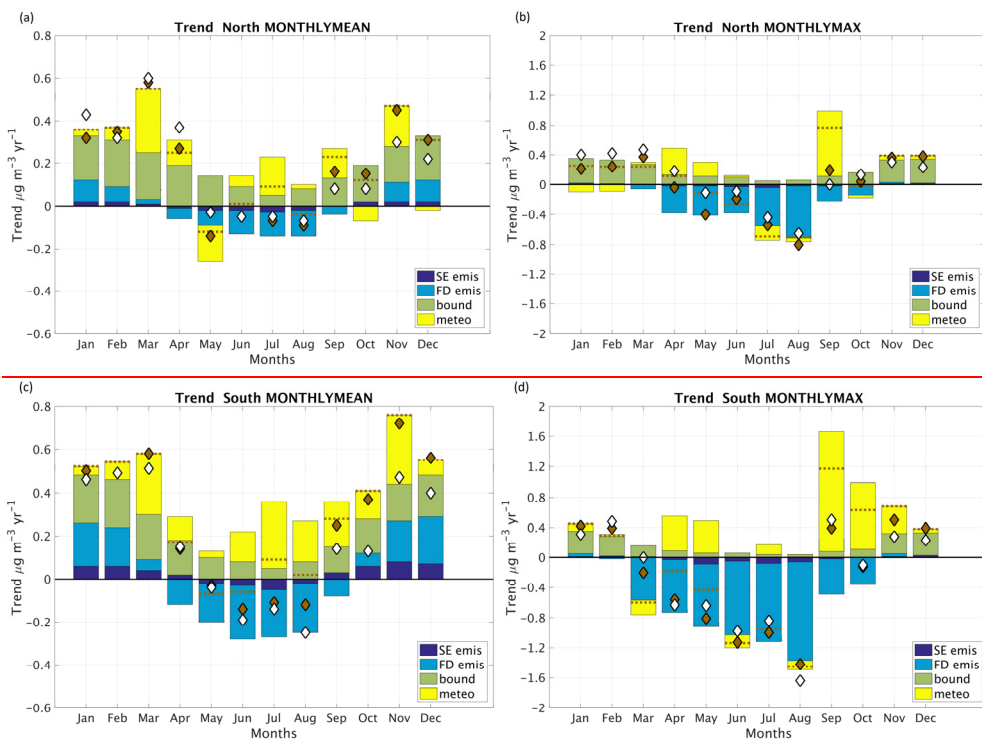

Figure 9. Linear trend over 1990-2013 in monthly mean ((a),(c)) and monthly maximum 1 hour mean ((b),(d)) near-surface ozone concentration for the North ((a),(b)) and the South ((c),(d)) Swedish regions (cf. Fig. 3). Reanalyzed (white diamond; LONGTERM reanalysis) and modelled “first guess” (MFG) near-surface ozone trend (brown diamond), and modelled contributions to the near-surface ozone trend due to change in emissions: anthropogenic Swedish (dark blue, SE<sub>emis</sub>) and full domain, non-Swedish (fair blue, FD<sub>emis</sub>), emissions, trend in top and lateral boundaries of relevant species (dark yellow, bound) and variation in meteorology (fair yellow, meteo). The sum of the modelled contributions is indicated by the dashed brown line.

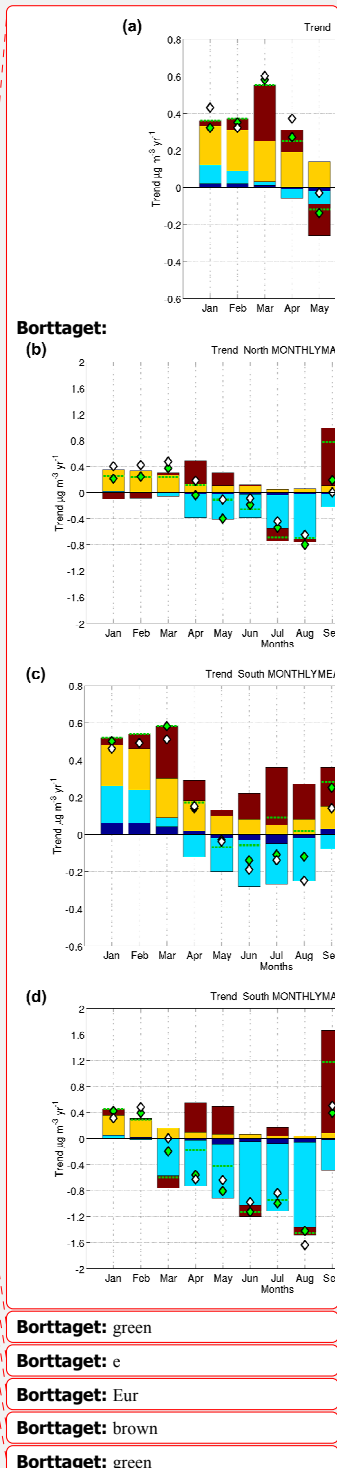

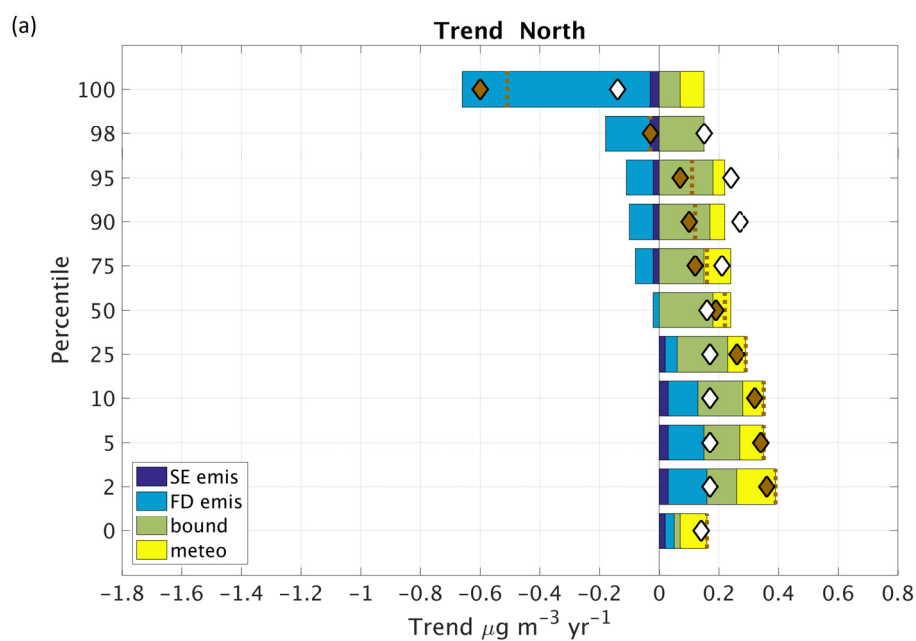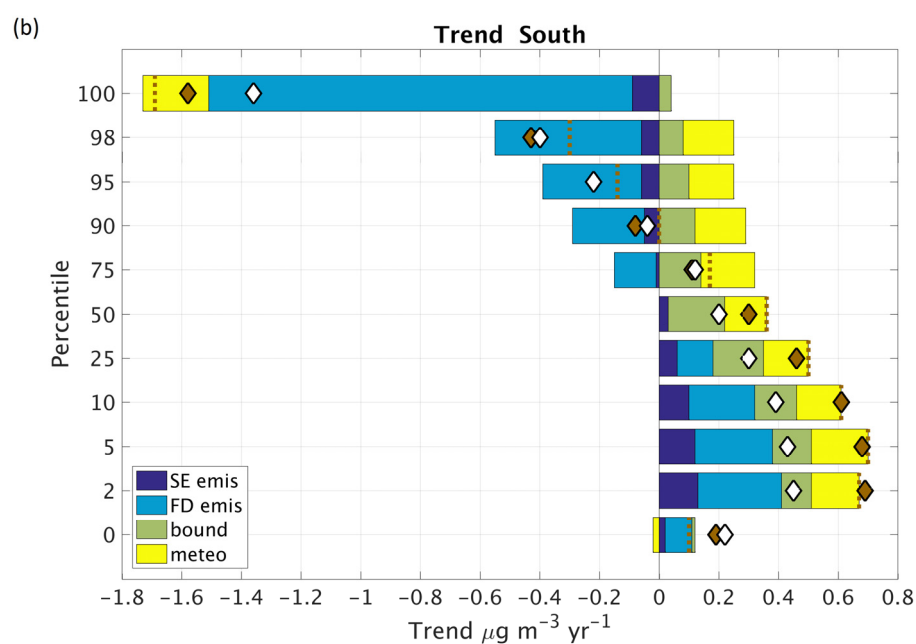

Figure 10. Linear trends over 1990-2013 in annual percentiles of hourly mean near-surface ozone concentrations for the North (a) and the South (b) Sweden regions. Reanalyzed (white diamond; LONGTERM reanalysis) and modelled MFG near-surface ozone trend (brown diamond; meteo)

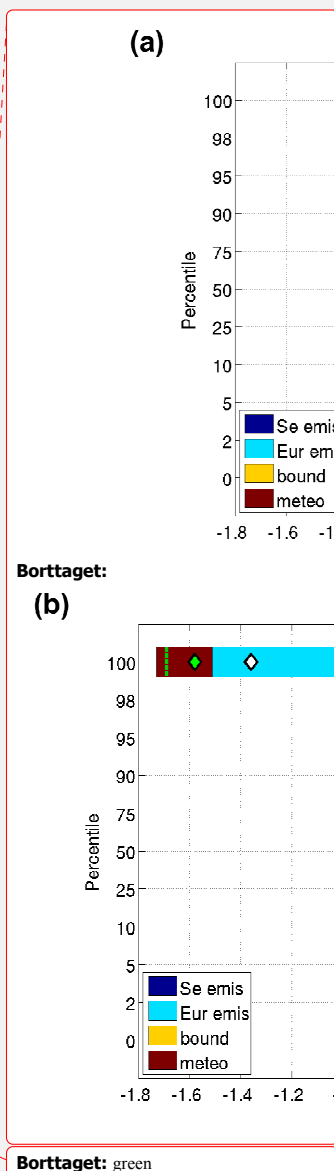

1 diamond), and modelled contributions to the near-surface ozone concentration trend due to  
2 change in emissions: anthropogenic Swedish (dark blue, SE emis) and full domain, non-  
3 Swedish (fair blue, FD emis), emissions, trend in top and lateral boundaries of relevant  
4 species (dark yellow, bound) and variation in meteorology (fair yellow, meteo). The sum of  
5 the modelled contributions is indicated by the dashed brown line.  
6

Borttaget: e

Borttaget: Eur

Borttaget: brown

Borttaget: green

1 Table 1a. Model calculations and scenarios, all covering the years 1990-2013, including the  
 2 “first guess” to the retrospective variational data analysis and base case to the sensitivity  
 3 simulations (MFG), two reanalysis data sets (LONGTERM and ALL), sensitivity scenarios  
 4 (MFD, MSE, MBC and MMET).

Borttaget: assimilation

Borttaget: EUR

| Scenario/data set | Description                                                                                                                                                                                                                                                                                                                                                                                    |
|-------------------|------------------------------------------------------------------------------------------------------------------------------------------------------------------------------------------------------------------------------------------------------------------------------------------------------------------------------------------------------------------------------------------------|
| MFG               | MATCH base case simulation and “first guess” used as input to the reanalyzes.                                                                                                                                                                                                                                                                                                                  |
| LONGTERM          | Reanalysis data set of hourly near-surface ozone concentration covering Sweden and Norway based on 1) the MFG European MATCH simulation and 2) selected hourly near-surface ozone measurements in Sweden and Norway, based on temporal coverage of the measurement sites. Optimal for trend analyses. Analyzed and presented in Sect. 3.                                                       |
| ALL               | Reanalysis data set of hourly near-surface ozone concentration covering Sweden and Norway based on 1) the MFG European MATCH simulation and 2) all available Swedish hourly ozone measurements and a selection of the Norwegian (as in LONGTERM). Not used for trend analyses in this study, but best estimate for the hourly near-surface ozone concentration in Sweden at any point in time. |
| MFD               | MATCH sensitivity simulation where the full domain anthropogenic emissions are kept constant from year to year, set to the level of 2011.                                                                                                                                                                                                                                                      |
| MSE               | MATCH sensitivity simulation where the Swedish anthropogenic emissions are kept constant from year to year, set to the level of 2011.                                                                                                                                                                                                                                                          |
| MBC               | MATCH sensitivity simulation where the top and lateral boundaries for all species are kept constant from year to year, set to the level of 2011.                                                                                                                                                                                                                                               |
| MMET              | MATCH sensitivity simulation where the meteorology is kept constant, using the meteorological year 2011.                                                                                                                                                                                                                                                                                       |

Borttaget: EUR

5  
6



1 Table 1b. Formation of contributions to the linear trend over the period 1990-2013 from the  
 2 sensitivity simulations (see Table 1a).

|         |                                                                                                                                                                                                     |
|---------|-----------------------------------------------------------------------------------------------------------------------------------------------------------------------------------------------------|
| SE emis | Contribution to the trend caused by the change in anthropogenic Swedish emissions, calculated as the model scenario difference: MFG-MSE.                                                            |
| FD emis | Contribution to the trend caused by the change in full domain anthropogenic, non-Swedish, emissions, calculated as the model scenario difference: (MFG-MFD)-(MFG-MSE).                              |
| emis    | Contribution to the trend caused by the change in full domain anthropogenic emissions, calculated as the model scenario difference: MFG-MFD. Used only for the base year sensitivity investigation. |
| bound   | Contribution to the trend caused by the change in lateral and upper boundaries, calculated as the model scenario difference: MFG-MBC.                                                               |
| meteo   | Contribution to the trend caused by the variation in meteorology, calculated as the model scenario difference: MFG-MMET.                                                                            |
| SUM     | Sum of the contributions to the trend, calculated as the sum of: SE emis+FD emis+Bound+Meteo.                                                                                                       |

**Borttaget:** Se emis, Eur emis, Bound and Meteo,

**Borttaget:** e

**Borttaget:** Eur

**Borttaget:** European, non-Swedish,

**Borttaget:** (

**Borttaget:** EUR)-(MFG-MSE)

**Borttaget:** B

**Borttaget:** M

**Borttaget:** e

**Borttaget:** Eur

3

4

Table 2. Evaluation of modelled hourly and daily maximum of 1h mean near-surface ozone concentrations in 2013 at Swedish observation sites. Mean value (mean), standard deviation ( $\sigma$ ), model mean bias normalized by the observed mean (%bias), Pearson correlation coefficients (r) for data including at least 10 pairs, the root mean square error (RMSE) and number of observed hours/days<sup>6</sup> at the sites. The evaluation includes the reanalyzed data sets ALL and LONGTERM, where ALL is evaluated at the 12 Swedish sites included in that simulation, and LONGTERM is evaluated at the 6 Swedish sites included in that simulation (cf. Fig. 4). For each of these data set evaluations we include the observation *dependent* reanalysis (2dvar), the observation *independent* cross validation of the reanalysis (cross) and the MATCH base case simulation (MFG). The top half of the table shows the temporal performance (spatial mean of evaluation statistics, see Supplement Sect. S1). The bottom half of the table shows spatial performance (spatial statistics of annual means, see Supplement Sect. S1).

|                      |       | spatial mean of <u>evaluation</u> statistics |                     |              |      |                  |        |
|----------------------|-------|----------------------------------------------|---------------------|--------------|------|------------------|--------|
| <u>Hourly mean</u>   |       | mean<br>(ppb(v))                             | std dev<br>(ppb(v)) | %bias<br>(%) | r    | RMSE<br>(ppb(v)) | #hours |
| ALL                  | obs   | 30.9                                         | 11.0                |              |      |                  | 8760   |
|                      | MFG   | 31.1                                         | 9.4                 | 1.4          | 0.67 | 8.8              |        |
|                      | cross | 30.6                                         | 9.9                 | -0.3         | 0.76 | 8.0              |        |
|                      | 2dvar | 30.8                                         | 11.1                | -0.6         | 0.94 | 3.5              |        |
| LONGTERM             | obs   | 32.6                                         | 10.5                |              |      |                  | 8760   |
|                      | MFG   | 31.2                                         | 9.7                 | -3.3         | 0.67 | 8.7              |        |
|                      | cross | 32.2                                         | 9.3                 | -0.1         | 0.72 | 8.5              |        |
|                      | 2dvar | 32.6                                         | 10.7                | 0.2          | 0.97 | 2.7              |        |
| <u>Daily maximum</u> |       | mean<br>(ppb(v))                             | std dev<br>(ppb(v)) | %bias<br>(%) | r    | RMSE<br>(ppb(v)) | #days  |
| ALL                  | obs   | 39.4                                         | 8.7                 |              |      |                  | 365    |
|                      | MFG   | 37.7                                         | 7.6                 | -4.3         | 0.79 | 5.8              |        |
|                      | cross | 38.3                                         | 7.9                 | -2.6         | 0.83 | 5.2              |        |
|                      | 2dvar | 39.5                                         | 8.5                 | 0.3          | 0.97 | 1.4              |        |
| LONGTERM             | obs   | 40.0                                         | 8.7                 |              |      |                  | 365    |
|                      | MFG   | 37.8                                         | 8.0                 | -5.6         | 0.79 | 6.0              |        |
|                      | cross | 38.7                                         | 7.9                 | -3.3         | 0.81 | 5.6              |        |
|                      | 2dvar | 40.4                                         | 8.9                 | 1.0          | 1.00 | 0.8              |        |
|                      |       | spatial statistics of annual means           |                     |              |      |                  |        |

Borttaget: hourly

Formaterad tabell

<sup>6</sup> A daily data coverage of 75% (>18 hours) is required to include the observed daily maximum as a valid observation.

Formaterat: Engelska (USA)

Formaterat: Engelska (USA)

Formaterat: Engelska (USA)

Formaterat: Engelska (USA)

| <u>Annual mean</u>                          |       | mean<br>(ppb(v)) | std dev<br>(ppb(v)) | %bias<br>(%) | r    | RMSE<br>(ppb(v)) | #stns |
|---------------------------------------------|-------|------------------|---------------------|--------------|------|------------------|-------|
| ALL                                         | obs   | 30.9             | 2.5                 |              |      |                  | 12    |
|                                             | MFG   | 31.1             | 1.2                 | 0.6          | 0.21 | 3.0              |       |
|                                             | cross | 30.6             | 1.8                 | -1.0         | 0.11 | 3.5              |       |
|                                             | 2dvar | 30.8             | 2.8                 | -0.5         | 0.98 | 0.7              |       |
| LONGTERM                                    | obs   | 32.6             | 2.2                 |              |      |                  | 6     |
|                                             | MFG   | 31.2             | 1.0                 | -4.1         | X    | 3.4              |       |
|                                             | cross | 32.2             | 1.6                 | -1.2         | X    | 4.3              |       |
|                                             | 2dvar | 32.6             | 2.2                 | 0.2          | X    | 0.2              |       |
| <u>Annual mean<br/>of daily<br/>maximum</u> |       | mean<br>(ppb(v)) | std dev<br>(ppb(v)) | %bias<br>(%) | r    | RMSE<br>(ppb(v)) | #stns |
| ALL                                         | obs   | 39.4             | 1.3                 |              |      |                  | 12    |
|                                             | MFG   | 37.7             | 1.2                 | -4.4         | 0.43 | 2.5              |       |
|                                             | cross | 38.3             | 1.6                 | -2.7         | 0.31 | 2.3              |       |
|                                             | 2dvar | 39.5             | 1.6                 | 0.3          | 0.90 | 1.0              |       |
| LONGTERM                                    | obs   | 40.0             | 1.6                 |              |      |                  | 6     |
|                                             | MFG   | 37.8             | 1.4                 | -5.7         | X    | 2.9              |       |
|                                             | cross | 38.7             | 2.0                 | -3.4         | X    | 2.7              |       |
|                                             | 2dvar | 40.4             | 1.6                 | 1.0          | X    | 0.4              |       |

← Formaterad tabell

1  
2

1 Table 3. Linear trend during 1990-2013 of policy related metrics in the 3 Swedish regions  
2 North, Central and South (cf. Fig. 3). Stars (\*, \*\*, and \*\*\*) indicate that the trend is  
3 significant ( $p \leq 0.05$ ,  $p \leq 0.01$ ,  $p \leq 0.001$ , respectively).

| Metrics                                                    | North         | Central        | South          |
|------------------------------------------------------------|---------------|----------------|----------------|
| Mean [ $\mu\text{g m}^{-3} \text{ year}^{-1}$ ]            | <b>+0.18*</b> | +0.13          | <b>+0.18*</b>  |
| SOMO35 [ppb(v) d $\text{year}^{-1}$ ]                      | +14           | -3.1           | -4.7           |
| Maximum 8h mean [ $\mu\text{g m}^{-3} \text{ year}^{-1}$ ] | -0.11         | <b>-0.68**</b> | <b>-1.2**</b>  |
| Maximum 1h mean [ $\mu\text{g m}^{-3} \text{ year}^{-1}$ ] | -0.14         | <b>-0.82**</b> | <b>-1.4***</b> |
| AOT40c [ppm(v) h $\text{year}^{-1}$ ]                      | -0.01         | <b>-0.07*</b>  | -0.09          |
| AOT40f [ppm(v) h $\text{year}^{-1}$ ]                      | +0.03         | -0.09          | <b>-0.12*</b>  |
| #hours $> 80 \mu\text{g m}^{-3}$ [# $\text{year}^{-1}$ ]   | <b>+26*</b>   | +1.7           | +6.6           |
| #days $> 70 \mu\text{g m}^{-3}$ [# $\text{year}^{-1}$ ]    | +1.3          | +0.73          | +1.1           |
| #days $> 120 \mu\text{g m}^{-3}$ [# $\text{year}^{-1}$ ]   | +0.01         | <b>-0.12*</b>  | <b>-0.32**</b> |

4

|                                               |                          |                            |
|-----------------------------------------------|--------------------------|----------------------------|
| <b>Sid. 30: [1] Formaterat</b>                | <b>Andersson Camilla</b> | <b>2017-08-22 12:52:00</b> |
| Teckensnitt:(Standard) Times New Roman, 12 pt |                          |                            |
| <b>Sid. 30: [1] Formaterat</b>                | <b>Andersson Camilla</b> | <b>2017-08-22 12:52:00</b> |
| Teckensnitt:(Standard) Times New Roman, 12 pt |                          |                            |
| <b>Sid. 30: [2] Formaterat</b>                | <b>Andersson Camilla</b> | <b>2017-08-22 12:52:00</b> |
| Teckensnitt:(Standard) Times New Roman, 12 pt |                          |                            |
| <b>Sid. 30: [2] Formaterat</b>                | <b>Andersson Camilla</b> | <b>2017-08-22 12:52:00</b> |
| Teckensnitt:(Standard) Times New Roman, 12 pt |                          |                            |
| <b>Sid. 30: [3] Formaterat</b>                | <b>Andersson Camilla</b> | <b>2017-08-22 12:52:00</b> |
| Teckensnitt:(Standard) Times New Roman, 12 pt |                          |                            |
| <b>Sid. 30: [3] Formaterat</b>                | <b>Andersson Camilla</b> | <b>2017-08-22 12:52:00</b> |
| Teckensnitt:(Standard) Times New Roman, 12 pt |                          |                            |
| <b>Sid. 30: [4] Formaterat</b>                | <b>Andersson Camilla</b> | <b>2017-08-22 12:52:00</b> |
| Teckensnitt:(Standard) Times New Roman, 12 pt |                          |                            |
| <b>Sid. 30: [4] Formaterat</b>                | <b>Andersson Camilla</b> | <b>2017-08-22 12:52:00</b> |
| Teckensnitt:(Standard) Times New Roman, 12 pt |                          |                            |
| <b>Sid. 30: [5] Formaterat</b>                | <b>Andersson Camilla</b> | <b>2017-08-22 12:52:00</b> |
| Teckensnitt:(Standard) Times New Roman, 12 pt |                          |                            |
| <b>Sid. 30: [5] Formaterat</b>                | <b>Andersson Camilla</b> | <b>2017-08-22 12:52:00</b> |
| Teckensnitt:(Standard) Times New Roman, 12 pt |                          |                            |
| <b>Sid. 30: [6] Formaterat</b>                | <b>Andersson Camilla</b> | <b>2017-08-22 12:52:00</b> |
| Teckensnitt:(Standard) Times New Roman, 12 pt |                          |                            |
| <b>Sid. 30: [6] Formaterat</b>                | <b>Andersson Camilla</b> | <b>2017-08-22 12:52:00</b> |
| Teckensnitt:(Standard) Times New Roman, 12 pt |                          |                            |
| <b>Sid. 30: [7] Formaterat</b>                | <b>Andersson Camilla</b> | <b>2017-08-22 12:52:00</b> |
| Teckensnitt:(Standard) Times New Roman, 12 pt |                          |                            |
| <b>Sid. 30: [7] Formaterat</b>                | <b>Andersson Camilla</b> | <b>2017-08-22 12:52:00</b> |
| Teckensnitt:(Standard) Times New Roman, 12 pt |                          |                            |
| <b>Sid. 30: [8] Formaterat</b>                | <b>Andersson Camilla</b> | <b>2017-08-22 12:52:00</b> |

Teckensnitt:(Standard) Times New Roman, 12 pt

|                                |                          |                            |
|--------------------------------|--------------------------|----------------------------|
| <b>Sid. 30: [8] Formaterat</b> | <b>Andersson Camilla</b> | <b>2017-08-22 12:52:00</b> |
|--------------------------------|--------------------------|----------------------------|

Teckensnitt:(Standard) Times New Roman, 12 pt

|                                |                          |                            |
|--------------------------------|--------------------------|----------------------------|
| <b>Sid. 30: [9] Formaterat</b> | <b>Andersson Camilla</b> | <b>2017-08-22 12:52:00</b> |
|--------------------------------|--------------------------|----------------------------|

Teckensnitt:(Standard) Times New Roman, 12 pt

|                                |                          |                            |
|--------------------------------|--------------------------|----------------------------|
| <b>Sid. 30: [9] Formaterat</b> | <b>Andersson Camilla</b> | <b>2017-08-22 12:52:00</b> |
|--------------------------------|--------------------------|----------------------------|

Teckensnitt:(Standard) Times New Roman, 12 pt

|                                 |                          |                            |
|---------------------------------|--------------------------|----------------------------|
| <b>Sid. 30: [10] Formaterat</b> | <b>Andersson Camilla</b> | <b>2017-08-22 12:52:00</b> |
|---------------------------------|--------------------------|----------------------------|

Teckensnitt:(Standard) Times New Roman, 12 pt

|                                 |                          |                            |
|---------------------------------|--------------------------|----------------------------|
| <b>Sid. 30: [10] Formaterat</b> | <b>Andersson Camilla</b> | <b>2017-08-22 12:52:00</b> |
|---------------------------------|--------------------------|----------------------------|

Teckensnitt:(Standard) Times New Roman, 12 pt

|                                 |                          |                            |
|---------------------------------|--------------------------|----------------------------|
| <b>Sid. 30: [10] Formaterat</b> | <b>Andersson Camilla</b> | <b>2017-08-22 12:52:00</b> |
|---------------------------------|--------------------------|----------------------------|

Teckensnitt:(Standard) Times New Roman, 12 pt

|                                 |                          |                            |
|---------------------------------|--------------------------|----------------------------|
| <b>Sid. 30: [10] Formaterat</b> | <b>Andersson Camilla</b> | <b>2017-08-22 12:52:00</b> |
|---------------------------------|--------------------------|----------------------------|

Teckensnitt:(Standard) Times New Roman, 12 pt

|                                 |                          |                            |
|---------------------------------|--------------------------|----------------------------|
| <b>Sid. 30: [10] Formaterat</b> | <b>Andersson Camilla</b> | <b>2017-08-22 12:52:00</b> |
|---------------------------------|--------------------------|----------------------------|

Teckensnitt:(Standard) Times New Roman, 12 pt

|                                 |                          |                            |
|---------------------------------|--------------------------|----------------------------|
| <b>Sid. 30: [10] Formaterat</b> | <b>Andersson Camilla</b> | <b>2017-08-22 12:52:00</b> |
|---------------------------------|--------------------------|----------------------------|

Teckensnitt:(Standard) Times New Roman, 12 pt

|                                 |                          |                            |
|---------------------------------|--------------------------|----------------------------|
| <b>Sid. 30: [10] Formaterat</b> | <b>Andersson Camilla</b> | <b>2017-08-22 12:52:00</b> |
|---------------------------------|--------------------------|----------------------------|

Teckensnitt:(Standard) Times New Roman, 12 pt

|                                 |                          |                            |
|---------------------------------|--------------------------|----------------------------|
| <b>Sid. 30: [10] Formaterat</b> | <b>Andersson Camilla</b> | <b>2017-08-22 12:52:00</b> |
|---------------------------------|--------------------------|----------------------------|

Teckensnitt:(Standard) Times New Roman, 12 pt

|                                 |                          |                            |
|---------------------------------|--------------------------|----------------------------|
| <b>Sid. 30: [10] Formaterat</b> | <b>Andersson Camilla</b> | <b>2017-08-22 12:52:00</b> |
|---------------------------------|--------------------------|----------------------------|

Teckensnitt:(Standard) Times New Roman, 12 pt

|                                 |                          |                            |
|---------------------------------|--------------------------|----------------------------|
| <b>Sid. 30: [10] Formaterat</b> | <b>Andersson Camilla</b> | <b>2017-08-22 12:52:00</b> |
|---------------------------------|--------------------------|----------------------------|

Teckensnitt:(Standard) Times New Roman, 12 pt

|                                 |                          |                            |
|---------------------------------|--------------------------|----------------------------|
| <b>Sid. 30: [10] Formaterat</b> | <b>Andersson Camilla</b> | <b>2017-08-22 12:52:00</b> |
|---------------------------------|--------------------------|----------------------------|

Teckensnitt:(Standard) Times New Roman, 12 pt

|                                 |                          |                            |
|---------------------------------|--------------------------|----------------------------|
| <b>Sid. 30: [10] Formaterat</b> | <b>Andersson Camilla</b> | <b>2017-08-22 12:52:00</b> |
|---------------------------------|--------------------------|----------------------------|

Teckensnitt:(Standard) Times New Roman, 12 pt

|                                 |                          |                            |
|---------------------------------|--------------------------|----------------------------|
| <b>Sid. 30: [10] Formaterat</b> | <b>Andersson Camilla</b> | <b>2017-08-22 12:52:00</b> |
|---------------------------------|--------------------------|----------------------------|

Teckensnitt:(Standard) Times New Roman, 12 pt

|                                 |                          |                            |
|---------------------------------|--------------------------|----------------------------|
| <b>Sid. 30: [10] Formaterat</b> | <b>Andersson Camilla</b> | <b>2017-08-22 12:52:00</b> |
|---------------------------------|--------------------------|----------------------------|

Teckensnitt:(Standard) Times New Roman, 12 pt

|                                 |                          |                            |
|---------------------------------|--------------------------|----------------------------|
| <b>Sid. 30: [10] Formaterat</b> | <b>Andersson Camilla</b> | <b>2017-08-22 12:52:00</b> |
|---------------------------------|--------------------------|----------------------------|

Teckensnitt:(Standard) Times New Roman, 12 pt

|                                 |                          |                            |
|---------------------------------|--------------------------|----------------------------|
| <b>Sid. 30: [10] Formaterat</b> | <b>Andersson Camilla</b> | <b>2017-08-22 12:52:00</b> |
|---------------------------------|--------------------------|----------------------------|

Teckensnitt:(Standard) Times New Roman, 12 pt

|                                 |                          |                            |
|---------------------------------|--------------------------|----------------------------|
| <b>Sid. 30: [10] Formaterat</b> | <b>Andersson Camilla</b> | <b>2017-08-22 12:52:00</b> |
|---------------------------------|--------------------------|----------------------------|

Teckensnitt:(Standard) Times New Roman, 12 pt

|                                 |                          |                            |
|---------------------------------|--------------------------|----------------------------|
| <b>Sid. 30: [10] Formaterat</b> | <b>Andersson Camilla</b> | <b>2017-08-22 12:52:00</b> |
|---------------------------------|--------------------------|----------------------------|

Teckensnitt:(Standard) Times New Roman, 12 pt

|                                 |                          |                            |
|---------------------------------|--------------------------|----------------------------|
| <b>Sid. 30: [10] Formaterat</b> | <b>Andersson Camilla</b> | <b>2017-08-22 12:52:00</b> |
|---------------------------------|--------------------------|----------------------------|

Teckensnitt:(Standard) Times New Roman, 12 pt

|                                 |                          |                            |
|---------------------------------|--------------------------|----------------------------|
| <b>Sid. 30: [10] Formaterat</b> | <b>Andersson Camilla</b> | <b>2017-08-22 12:52:00</b> |
|---------------------------------|--------------------------|----------------------------|

Teckensnitt:(Standard) Times New Roman, 12 pt

|                                 |                          |                            |
|---------------------------------|--------------------------|----------------------------|
| <b>Sid. 30: [10] Formaterat</b> | <b>Andersson Camilla</b> | <b>2017-08-22 12:52:00</b> |
|---------------------------------|--------------------------|----------------------------|

Teckensnitt:(Standard) Times New Roman, 12 pt

|                                 |                          |                            |
|---------------------------------|--------------------------|----------------------------|
| <b>Sid. 30: [10] Formaterat</b> | <b>Andersson Camilla</b> | <b>2017-08-22 12:52:00</b> |
|---------------------------------|--------------------------|----------------------------|

Teckensnitt:(Standard) Times New Roman, 12 pt

|                                 |                          |                            |
|---------------------------------|--------------------------|----------------------------|
| <b>Sid. 30: [10] Formaterat</b> | <b>Andersson Camilla</b> | <b>2017-08-22 12:52:00</b> |
|---------------------------------|--------------------------|----------------------------|

Teckensnitt:(Standard) Times New Roman, 12 pt

|                                 |                          |                            |
|---------------------------------|--------------------------|----------------------------|
| <b>Sid. 30: [10] Formaterat</b> | <b>Andersson Camilla</b> | <b>2017-08-22 12:52:00</b> |
|---------------------------------|--------------------------|----------------------------|

Teckensnitt:(Standard) Times New Roman, 12 pt

|                                 |                          |                            |
|---------------------------------|--------------------------|----------------------------|
| <b>Sid. 30: [10] Formaterat</b> | <b>Andersson Camilla</b> | <b>2017-08-22 12:52:00</b> |
|---------------------------------|--------------------------|----------------------------|

Teckensnitt:(Standard) Times New Roman, 12 pt

|                                 |                          |                            |
|---------------------------------|--------------------------|----------------------------|
| <b>Sid. 30: [10] Formaterat</b> | <b>Andersson Camilla</b> | <b>2017-08-22 12:52:00</b> |
|---------------------------------|--------------------------|----------------------------|

Teckensnitt:(Standard) Times New Roman, 12 pt

|                                 |                          |                            |
|---------------------------------|--------------------------|----------------------------|
| <b>Sid. 30: [10] Formaterat</b> | <b>Andersson Camilla</b> | <b>2017-08-22 12:52:00</b> |
|---------------------------------|--------------------------|----------------------------|

Teckensnitt:(Standard) Times New Roman, 12 pt

|                                 |                          |                            |
|---------------------------------|--------------------------|----------------------------|
| <b>Sid. 30: [10] Formaterat</b> | <b>Andersson Camilla</b> | <b>2017-08-22 12:52:00</b> |
|---------------------------------|--------------------------|----------------------------|

Teckensnitt:(Standard) Times New Roman, 12 pt

|                                 |                          |                            |
|---------------------------------|--------------------------|----------------------------|
| <b>Sid. 30: [10] Formaterat</b> | <b>Andersson Camilla</b> | <b>2017-08-22 12:52:00</b> |
|---------------------------------|--------------------------|----------------------------|

Teckensnitt:(Standard) Times New Roman, 12 pt

|                                 |                          |                            |
|---------------------------------|--------------------------|----------------------------|
| <b>Sid. 30: [10] Formaterat</b> | <b>Andersson Camilla</b> | <b>2017-08-22 12:52:00</b> |
|---------------------------------|--------------------------|----------------------------|

Teckensnitt:(Standard) Times New Roman, 12 pt

|                                 |                          |                            |
|---------------------------------|--------------------------|----------------------------|
| <b>Sid. 30: [10] Formaterat</b> | <b>Andersson Camilla</b> | <b>2017-08-22 12:52:00</b> |
|---------------------------------|--------------------------|----------------------------|

Teckensnitt:(Standard) Times New Roman, 12 pt

|                                 |                          |                            |
|---------------------------------|--------------------------|----------------------------|
| <b>Sid. 30: [10] Formaterat</b> | <b>Andersson Camilla</b> | <b>2017-08-22 12:52:00</b> |
|---------------------------------|--------------------------|----------------------------|

Teckensnitt:(Standard) Times New Roman, 12 pt

|                                 |                          |                            |
|---------------------------------|--------------------------|----------------------------|
| <b>Sid. 30: [10] Formaterat</b> | <b>Andersson Camilla</b> | <b>2017-08-22 12:52:00</b> |
|---------------------------------|--------------------------|----------------------------|

Teckensnitt:(Standard) Times New Roman, 12 pt

|                                 |                          |                            |
|---------------------------------|--------------------------|----------------------------|
| <b>Sid. 30: [10] Formaterat</b> | <b>Andersson Camilla</b> | <b>2017-08-22 12:52:00</b> |
|---------------------------------|--------------------------|----------------------------|

Teckensnitt:(Standard) Times New Roman, 12 pt

|                                 |                          |                            |
|---------------------------------|--------------------------|----------------------------|
| <b>Sid. 30: [10] Formaterat</b> | <b>Andersson Camilla</b> | <b>2017-08-22 12:52:00</b> |
|---------------------------------|--------------------------|----------------------------|

Teckensnitt:(Standard) Times New Roman, 12 pt

|                                 |                          |                            |
|---------------------------------|--------------------------|----------------------------|
| <b>Sid. 30: [10] Formaterat</b> | <b>Andersson Camilla</b> | <b>2017-08-22 12:52:00</b> |
|---------------------------------|--------------------------|----------------------------|

Teckensnitt:(Standard) Times New Roman, 12 pt

|                                 |                          |                            |
|---------------------------------|--------------------------|----------------------------|
| <b>Sid. 30: [10] Formaterat</b> | <b>Andersson Camilla</b> | <b>2017-08-22 12:52:00</b> |
|---------------------------------|--------------------------|----------------------------|

Teckensnitt:(Standard) Times New Roman, 12 pt

|                                 |                          |                            |
|---------------------------------|--------------------------|----------------------------|
| <b>Sid. 30: [10] Formaterat</b> | <b>Andersson Camilla</b> | <b>2017-08-22 12:52:00</b> |
|---------------------------------|--------------------------|----------------------------|

Teckensnitt:(Standard) Times New Roman, 12 pt

|                                 |                          |                            |
|---------------------------------|--------------------------|----------------------------|
| <b>Sid. 30: [10] Formaterat</b> | <b>Andersson Camilla</b> | <b>2017-08-22 12:52:00</b> |
|---------------------------------|--------------------------|----------------------------|

Teckensnitt:(Standard) Times New Roman, 12 pt

|                                 |                          |                            |
|---------------------------------|--------------------------|----------------------------|
| <b>Sid. 30: [10] Formaterat</b> | <b>Andersson Camilla</b> | <b>2017-08-22 12:52:00</b> |
|---------------------------------|--------------------------|----------------------------|

Teckensnitt:(Standard) Times New Roman, 12 pt



|                                 |                          |                            |
|---------------------------------|--------------------------|----------------------------|
| <b>Sid. 30: [10] Formaterat</b> | <b>Andersson Camilla</b> | <b>2017-08-22 12:52:00</b> |
|---------------------------------|--------------------------|----------------------------|

Teckensnitt:(Standard) Times New Roman, 12 pt

|                                 |                          |                            |
|---------------------------------|--------------------------|----------------------------|
| <b>Sid. 30: [10] Formaterat</b> | <b>Andersson Camilla</b> | <b>2017-08-22 12:52:00</b> |
|---------------------------------|--------------------------|----------------------------|

Teckensnitt:(Standard) Times New Roman, 12 pt

|                                 |                          |                            |
|---------------------------------|--------------------------|----------------------------|
| <b>Sid. 30: [10] Formaterat</b> | <b>Andersson Camilla</b> | <b>2017-08-22 12:52:00</b> |
|---------------------------------|--------------------------|----------------------------|

Teckensnitt:(Standard) Times New Roman, 12 pt

|                                 |                          |                            |
|---------------------------------|--------------------------|----------------------------|
| <b>Sid. 30: [10] Formaterat</b> | <b>Andersson Camilla</b> | <b>2017-08-22 12:52:00</b> |
|---------------------------------|--------------------------|----------------------------|

Teckensnitt:(Standard) Times New Roman, 12 pt

|                                 |                          |                            |
|---------------------------------|--------------------------|----------------------------|
| <b>Sid. 30: [10] Formaterat</b> | <b>Andersson Camilla</b> | <b>2017-08-22 12:52:00</b> |
|---------------------------------|--------------------------|----------------------------|

Teckensnitt:(Standard) Times New Roman, 12 pt

|                                 |                          |                            |
|---------------------------------|--------------------------|----------------------------|
| <b>Sid. 30: [10] Formaterat</b> | <b>Andersson Camilla</b> | <b>2017-08-22 12:52:00</b> |
|---------------------------------|--------------------------|----------------------------|

Teckensnitt:(Standard) Times New Roman, 12 pt

|                                 |                          |                            |
|---------------------------------|--------------------------|----------------------------|
| <b>Sid. 30: [10] Formaterat</b> | <b>Andersson Camilla</b> | <b>2017-08-22 12:52:00</b> |
|---------------------------------|--------------------------|----------------------------|

Teckensnitt:(Standard) Times New Roman, 12 pt

|                                 |                          |                            |
|---------------------------------|--------------------------|----------------------------|
| <b>Sid. 30: [10] Formaterat</b> | <b>Andersson Camilla</b> | <b>2017-08-22 12:52:00</b> |
|---------------------------------|--------------------------|----------------------------|

Teckensnitt:(Standard) Times New Roman, 12 pt

|                                 |                          |                            |
|---------------------------------|--------------------------|----------------------------|
| <b>Sid. 30: [10] Formaterat</b> | <b>Andersson Camilla</b> | <b>2017-08-22 12:52:00</b> |
|---------------------------------|--------------------------|----------------------------|

Teckensnitt:(Standard) Times New Roman, 12 pt

|                                 |                          |                            |
|---------------------------------|--------------------------|----------------------------|
| <b>Sid. 30: [10] Formaterat</b> | <b>Andersson Camilla</b> | <b>2017-08-22 12:52:00</b> |
|---------------------------------|--------------------------|----------------------------|

Teckensnitt:(Standard) Times New Roman, 12 pt

|                                 |                          |                            |
|---------------------------------|--------------------------|----------------------------|
| <b>Sid. 30: [10] Formaterat</b> | <b>Andersson Camilla</b> | <b>2017-08-22 12:52:00</b> |
|---------------------------------|--------------------------|----------------------------|

Teckensnitt:(Standard) Times New Roman, 12 pt

|                                 |                          |                            |
|---------------------------------|--------------------------|----------------------------|
| <b>Sid. 30: [10] Formaterat</b> | <b>Andersson Camilla</b> | <b>2017-08-22 12:52:00</b> |
|---------------------------------|--------------------------|----------------------------|

Teckensnitt:(Standard) Times New Roman, 12 pt

|                                 |                          |                            |
|---------------------------------|--------------------------|----------------------------|
| <b>Sid. 30: [10] Formaterat</b> | <b>Andersson Camilla</b> | <b>2017-08-22 12:52:00</b> |
|---------------------------------|--------------------------|----------------------------|

Teckensnitt:(Standard) Times New Roman, 12 pt

|                                 |                          |                            |
|---------------------------------|--------------------------|----------------------------|
| <b>Sid. 30: [10] Formaterat</b> | <b>Andersson Camilla</b> | <b>2017-08-22 12:52:00</b> |
|---------------------------------|--------------------------|----------------------------|

Teckensnitt:(Standard) Times New Roman, 12 pt

|                                 |                          |                            |
|---------------------------------|--------------------------|----------------------------|
| <b>Sid. 30: [10] Formaterat</b> | <b>Andersson Camilla</b> | <b>2017-08-22 12:52:00</b> |
|---------------------------------|--------------------------|----------------------------|

Teckensnitt:(Standard) Times New Roman, 12 pt

|                                 |                          |                            |
|---------------------------------|--------------------------|----------------------------|
| <b>Sid. 30: [10] Formaterat</b> | <b>Andersson Camilla</b> | <b>2017-08-22 12:52:00</b> |
|---------------------------------|--------------------------|----------------------------|

Teckensnitt:(Standard) Times New Roman, 12 pt

|                                 |                          |                            |
|---------------------------------|--------------------------|----------------------------|
| <b>Sid. 30: [10] Formaterat</b> | <b>Andersson Camilla</b> | <b>2017-08-22 12:52:00</b> |
|---------------------------------|--------------------------|----------------------------|

Teckensnitt:(Standard) Times New Roman, 12 pt

|                                 |                          |                            |
|---------------------------------|--------------------------|----------------------------|
| <b>Sid. 30: [10] Formaterat</b> | <b>Andersson Camilla</b> | <b>2017-08-22 12:52:00</b> |
|---------------------------------|--------------------------|----------------------------|

Teckensnitt:(Standard) Times New Roman, 12 pt

|                                 |                          |                            |
|---------------------------------|--------------------------|----------------------------|
| <b>Sid. 30: [10] Formaterat</b> | <b>Andersson Camilla</b> | <b>2017-08-22 12:52:00</b> |
|---------------------------------|--------------------------|----------------------------|

Teckensnitt:(Standard) Times New Roman, 12 pt

|                                 |                          |                            |
|---------------------------------|--------------------------|----------------------------|
| <b>Sid. 30: [10] Formaterat</b> | <b>Andersson Camilla</b> | <b>2017-08-22 12:52:00</b> |
|---------------------------------|--------------------------|----------------------------|

Teckensnitt:(Standard) Times New Roman, 12 pt

|                                 |                          |                            |
|---------------------------------|--------------------------|----------------------------|
| <b>Sid. 30: [10] Formaterat</b> | <b>Andersson Camilla</b> | <b>2017-08-22 12:52:00</b> |
|---------------------------------|--------------------------|----------------------------|

Teckensnitt:(Standard) Times New Roman, 12 pt

|                                 |                          |                            |
|---------------------------------|--------------------------|----------------------------|
| <b>Sid. 30: [10] Formaterat</b> | <b>Andersson Camilla</b> | <b>2017-08-22 12:52:00</b> |
|---------------------------------|--------------------------|----------------------------|

Teckensnitt:(Standard) Times New Roman, 12 pt

|                                 |                          |                            |
|---------------------------------|--------------------------|----------------------------|
| <b>Sid. 30: [10] Formaterat</b> | <b>Andersson Camilla</b> | <b>2017-08-22 12:52:00</b> |
|---------------------------------|--------------------------|----------------------------|

Teckensnitt:(Standard) Times New Roman, 12 pt

|                                 |                          |                            |
|---------------------------------|--------------------------|----------------------------|
| <b>Sid. 30: [10] Formaterat</b> | <b>Andersson Camilla</b> | <b>2017-08-22 12:52:00</b> |
|---------------------------------|--------------------------|----------------------------|

Teckensnitt:(Standard) Times New Roman, 12 pt

|                                 |                          |                            |
|---------------------------------|--------------------------|----------------------------|
| <b>Sid. 30: [10] Formaterat</b> | <b>Andersson Camilla</b> | <b>2017-08-22 12:52:00</b> |
|---------------------------------|--------------------------|----------------------------|

Teckensnitt:(Standard) Times New Roman, 12 pt

|                                 |                          |                            |
|---------------------------------|--------------------------|----------------------------|
| <b>Sid. 30: [10] Formaterat</b> | <b>Andersson Camilla</b> | <b>2017-08-22 12:52:00</b> |
|---------------------------------|--------------------------|----------------------------|

Teckensnitt:(Standard) Times New Roman, 12 pt

|                                 |                          |                            |
|---------------------------------|--------------------------|----------------------------|
| <b>Sid. 30: [10] Formaterat</b> | <b>Andersson Camilla</b> | <b>2017-08-22 12:52:00</b> |
|---------------------------------|--------------------------|----------------------------|

Teckensnitt:(Standard) Times New Roman, 12 pt

|                                 |                          |                            |
|---------------------------------|--------------------------|----------------------------|
| <b>Sid. 30: [10] Formaterat</b> | <b>Andersson Camilla</b> | <b>2017-08-22 12:52:00</b> |
|---------------------------------|--------------------------|----------------------------|

Teckensnitt:(Standard) Times New Roman, 12 pt

|                                 |                          |                            |
|---------------------------------|--------------------------|----------------------------|
| <b>Sid. 30: [10] Formaterat</b> | <b>Andersson Camilla</b> | <b>2017-08-22 12:52:00</b> |
|---------------------------------|--------------------------|----------------------------|

Teckensnitt:(Standard) Times New Roman, 12 pt

|                                                                            |                          |                            |
|----------------------------------------------------------------------------|--------------------------|----------------------------|
| <b>Sid. 30: [10] Formaterat</b>                                            | <b>Andersson Camilla</b> | <b>2017-08-22 12:52:00</b> |
| Teckensnitt:(Standard) Times New Roman, 12 pt                              |                          |                            |
| <b>Sid. 30: [10] Formaterat</b>                                            | <b>Andersson Camilla</b> | <b>2017-08-22 12:52:00</b> |
| Teckensnitt:(Standard) Times New Roman, 12 pt                              |                          |                            |
| <b>Sid. 30: [10] Formaterat</b>                                            | <b>Andersson Camilla</b> | <b>2017-08-22 12:52:00</b> |
| Teckensnitt:(Standard) Times New Roman, 12 pt                              |                          |                            |
| <b>Sid. 30: [10] Formaterat</b>                                            | <b>Andersson Camilla</b> | <b>2017-08-22 12:52:00</b> |
| Teckensnitt:(Standard) Times New Roman, 12 pt                              |                          |                            |
| <b>Sid. 30: [10] Formaterat</b>                                            | <b>Andersson Camilla</b> | <b>2017-08-22 12:52:00</b> |
| Teckensnitt:(Standard) Times New Roman, 12 pt                              |                          |                            |
| <b>Sid. 30: [10] Formaterat</b>                                            | <b>Andersson Camilla</b> | <b>2017-08-22 12:52:00</b> |
| Teckensnitt:(Standard) Times New Roman, 12 pt                              |                          |                            |
| <b>Sid. 30: [10] Formaterat</b>                                            | <b>Andersson Camilla</b> | <b>2017-08-22 12:52:00</b> |
| Teckensnitt:(Standard) Times New Roman, 12 pt                              |                          |                            |
| <b>Sid. 30: [10] Formaterat</b>                                            | <b>Andersson Camilla</b> | <b>2017-08-22 12:52:00</b> |
| Teckensnitt:(Standard) Times New Roman, 12 pt                              |                          |                            |
| <b>Sid. 30: [10] Formaterat</b>                                            | <b>Andersson Camilla</b> | <b>2017-08-22 12:52:00</b> |
| Teckensnitt:(Standard) Times New Roman, 12 pt                              |                          |                            |
| <b>Sid. 30: [11] Formaterat</b>                                            | <b>Andersson Camilla</b> | <b>2017-08-21 13:00:00</b> |
| Betonning, Teckensnitt:(Standard) Times New Roman, 12 pt, Tyska (Tyskland) |                          |                            |
| <b>Sid. 30: [11] Formaterat</b>                                            | <b>Andersson Camilla</b> | <b>2017-08-21 13:00:00</b> |
| Betonning, Teckensnitt:(Standard) Times New Roman, 12 pt, Tyska (Tyskland) |                          |                            |
| <b>Sid. 30: [11] Formaterat</b>                                            | <b>Andersson Camilla</b> | <b>2017-08-21 13:00:00</b> |
| Betonning, Teckensnitt:(Standard) Times New Roman, 12 pt, Tyska (Tyskland) |                          |                            |
| <b>Sid. 30: [11] Formaterat</b>                                            | <b>Andersson Camilla</b> | <b>2017-08-21 13:00:00</b> |
| Betonning, Teckensnitt:(Standard) Times New Roman, 12 pt, Tyska (Tyskland) |                          |                            |

Betoning, Teckensnitt:(Standard) Times New Roman, 12 pt, Tyska (Tyskland)

Sid. 50: [12] Borttaget

Andersson Camilla

2017-09-04 14:17:00

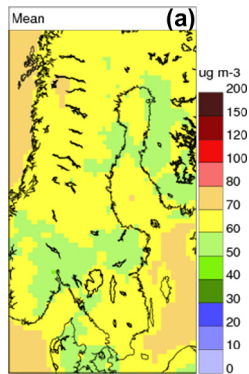

Sid. 50: [12] Borttaget

Andersson Camilla

2017-09-04 14:17:00

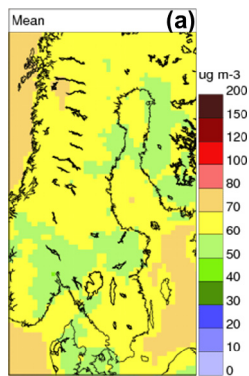

Sid. 50: [12] Borttaget

Andersson Camilla

2017-09-04 14:17:00

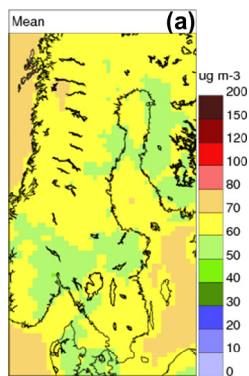

Sid. 50: [12] Borttaget

Andersson Camilla

2017-09-04 14:17:00

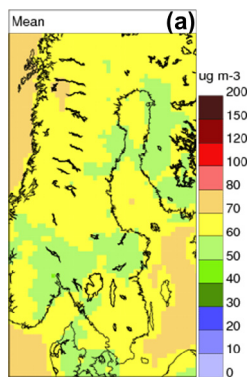

Sid. 50: [12] Borttaget

Andersson Camilla

2017-09-04 14:17:00

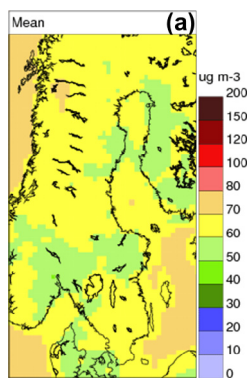

Sid. 50: [12] Borttaget

Andersson Camilla

2017-09-04 14:17:00

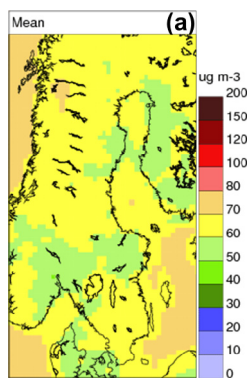

Sid. 50: [12] Borttaget

Andersson Camilla

2017-09-04 14:17:00

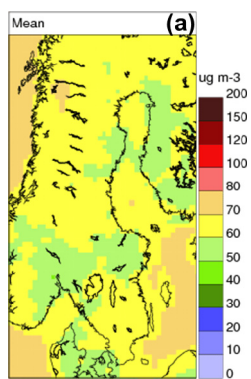

Sid. 50: [12] Borttaget

Andersson Camilla

2017-09-04 14:17:00

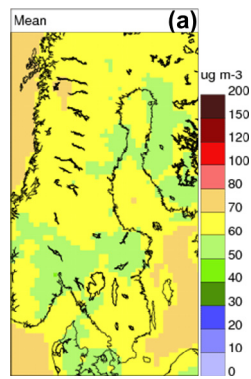

Sid. 50: [12] Borttaget

Andersson Camilla

2017-09-04 14:17:00

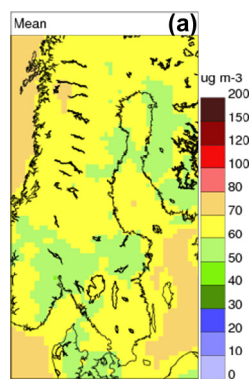

Sid. 50: [12] Borttaget

Andersson Camilla

2017-09-04 14:17:00



Supplement: Supplementary file [file REANALYSISO3_ACPD_revised_revised_final.pdf › REANALYSISO3_ACPD_revised_revised_final.pdf]
