# Supplementary material for: Reanalysis of and attribution to near-surface ozone concentrations in Sweden during 1990–2013
Source: Copernicus journal article supplement (doi:10.5194/acp-2017-338), 2017-06-20
Supplement: Supplementary file [file R1_authorcomments_final_tableX1.pdf › R1_authorcomments_final_tableX1.pdf]

**Table X1.**

|                                                            | 1990-2013 |         |          | 1991-2013 |         |         | 1992-2013 |          |          |
|------------------------------------------------------------|-----------|---------|----------|-----------|---------|---------|-----------|----------|----------|
|                                                            | North     | Central | South    | North     | Central | South   | North     | Central  | South    |
| Mean [ $\mu\text{g m}^{-3} \text{ year}^{-1}$ ]            | +0.18*    | 0.13    | +0.18*   | 0.14      | 0.09    | 0.16    | 0.07      | 0.04     | 0.12     |
| SOMO35 [ppb(v) d $\text{year}^{-1}$ ]                      | 14.32     | -3.05   | -4.65    | 10.91     | -5.84   | -4.2    | 4.68      | -12.15   | -10.81   |
| Maximum 8h mean [ $\mu\text{g m}^{-3} \text{ year}^{-1}$ ] | -0.11     | -0.68** | -1.16**  | -0.06     | -0.61*  | -0.99** | -0.23     | -0.82*** | -1.30*** |
| Maximum 1h mean [ $\mu\text{g m}^{-3} \text{ year}^{-1}$ ] | -0.14     | -0.82** | -1.36*** | -0.08     | -0.71** | -1.17** | -0.27     | -0.94*** | -1.50*** |
| AOT40c [ppm(v) h $\text{year}^{-1}$ ]                      | -0.01     | -0.07*  | -0.09    | -0.02     | -0.08*  | -0.09   | -0.04*    | -0.11**  | -0.13*   |
| AOT40f [ppm(v) h $\text{year}^{-1}$ ]                      | 0.03      | -0.09   | -0.12*   | 0.01      | -0.10*  | -0.12   | -0.02     | -0.14**  | -0.16*   |
| #hours >80 $\mu\text{g m}^{-3}$ [# $\text{year}^{-1}$ ]    | +26.32*   | 1.7     | 6.61     | 20.95     | -2.18   | 5.56    | 12.3      | -8.51    | -0.29    |
| #days >70 $\mu\text{g m}^{-3}$ [# $\text{year}^{-1}$ ]     | 1.31      | 0.73    | 1.12     | 1.03      | 0.39    | 1       | 0.54      | -0.03    | 0.69     |
| #days >120 $\mu\text{g m}^{-3}$ [# $\text{year}^{-1}$ ]    | 0.01      | -0.12*  | -0.32**  | 0.01      | -0.11*  | -0.28*  | 0         | -0.15**  | -0.36**  |
|                                                            | 1990-2012 |         |          | 1990-2011 |         |         |           |          |          |
|                                                            | North     | Central | South    | North     | Central | South   |           |          |          |
| Mean [ $\mu\text{g m}^{-3} \text{ year}^{-1}$ ]            | 0.16      | 0.13    | 0.15     | +0.21*    | +0.18*  | 0.17    |           |          |          |
| SOMO35 [ppb(v) d $\text{year}^{-1}$ ]                      | 13.87     | -1.99   | -7.46    | +18.92*   | 3.56    | -4.66   |           |          |          |
| Maximum 8h mean [ $\mu\text{g m}^{-3} \text{ year}^{-1}$ ] | -0.23     | -0.63*  | -1.10**  | -0.06     | -0.53*  | -1.05*  |           |          |          |
| Maximum 1h mean [ $\mu\text{g m}^{-3} \text{ year}^{-1}$ ] | -0.23     | -0.76** | -1.32**  | -0.11     | -0.64*  | -1.26** |           |          |          |
| AOT40c [ppm(v) h $\text{year}^{-1}$ ]                      | -0.01     | -0.06   | -0.09    | 0         | -0.05   | -0.09   |           |          |          |
| AOT40f [ppm(v) h $\text{year}^{-1}$ ]                      | 0.03      | -0.08   | -0.13*   | 0.05      | -0.05   | -0.12   |           |          |          |
| #hours >80 $\mu\text{g m}^{-3}$ [# $\text{year}^{-1}$ ]    | +26.03*   | 1.95    | 2.6      | +32.94*   | 8.07    | 5.73    |           |          |          |
| #days >70 $\mu\text{g m}^{-3}$ [# $\text{year}^{-1}$ ]     | 1.14      | 0.82    | 0.92     | 1.53      | 1.28    | 1.12    |           |          |          |
| #days >120 $\mu\text{g m}^{-3}$ [# $\text{year}^{-1}$ ]    | 0         | -0.11*  | -0.32**  | 0.01      | -0.1    | -0.31*  |           |          |          |
