# Supplementary material for: Reanalysis of and attribution to near-surface ozone concentrations in Sweden during 1990–2013
Source: Copernicus journal article supplement (doi:10.5194/acp-2017-338), 2017-06-20
Supplement: Supplementary file [file R1_authorcomments_final_tableX2.pdf › R1_authorcomments_final_tableX2.pdf]

**Table X2.**

|                                                            | Spatial mean of grid box trend |                 |                 | Trend in spatial mean<br>(original Table 3) |                |                |
|------------------------------------------------------------|--------------------------------|-----------------|-----------------|---------------------------------------------|----------------|----------------|
|                                                            | North                          | Central         | South           | North                                       | Central        | South          |
| Mean [ $\mu\text{g m}^{-3} \text{ year}^{-1}$ ]            | +0.18                          | +0.13           | +0.18           | <b>+0.18*</b>                               | +0.13          | <b>+0.18*</b>  |
| SOMO35 [ppb(v) d<br>$\text{year}^{-1}$ ]                   | +14                            | <b>-3.1***</b>  | <b>-4.7***</b>  | +14                                         | -3.1           | -4.7           |
| Maximum 8h mean [ $\mu\text{g m}^{-3} \text{ year}^{-1}$ ] | <b>-0.11***</b>                | <b>-0.68***</b> | <b>-1.2***</b>  | -0.11                                       | <b>-0.68**</b> | <b>-1.2**</b>  |
| Maximum 1h mean [ $\mu\text{g m}^{-3} \text{ year}^{-1}$ ] | <b>-0.14***</b>                | <b>-0.82***</b> | <b>-1.4***</b>  | -0.14                                       | <b>-0.82**</b> | <b>-1.4***</b> |
| AOT40c [ppm(v) h<br>$\text{year}^{-1}$ ]                   | <b>-0.01***</b>                | <b>-0.07***</b> | <b>-0.09***</b> | -0.01                                       | <b>-0.07*</b>  | -0.09          |
| AOT40f [ppm(v) h<br>$\text{year}^{-1}$ ]                   | <b>0.03*</b>                   | <b>-0.09***</b> | <b>-0.12***</b> | +0.03                                       | -0.09          | <b>-0.12*</b>  |
| #hours >80 $\mu\text{g m}^{-3}$ [#<br>$\text{year}^{-1}$ ] | +26                            | +1.7            | +6.6            | <b>+26*</b>                                 | +1.7           | +6.6           |
| #days >70 $\mu\text{g m}^{-3}$ [#<br>$\text{year}^{-1}$ ]  | +1.3                           | +0.73           | +1.1            | +1.3                                        | +0.73          | +1.1           |
| #days >120 $\mu\text{g m}^{-3}$ [#<br>$\text{year}^{-1}$ ] | <b>+0.01**</b>                 | <b>-0.12***</b> | <b>-0.32***</b> | +0.01                                       | <b>-0.12*</b>  | <b>-0.32**</b> |
